# Supplementary material for: Birth outcomes between 22 and 26 weeks' gestation in national population‐based cohorts from Sweden, England and France
Source: PubMed Central journal article supplement — Acta Paediatr. 2021 Sep 12;111(1):59–75. doi: 10.1111/apa.16084 (PMC9291863; doi:10.1111/apa.16084), 2021-09-12
Supplement: APA-111-59-s001.pdf [file APA-111-59-s001.pdf]

# Birth outcomes between 22 to 26 weeks' gestation in national population-based cohorts from Sweden, England and France – supplementary appendix S1

Andrei S. Morgan PhD<sup>a,b,c,\*</sup>, Jennifer Zeitlin PhD<sup>a</sup>, Karin Källén PhD<sup>d</sup>, Elizabeth S. Draper PhD<sup>e</sup>, Karel Maršál PhD<sup>f</sup>, Mikael Norman PhD<sup>g,h</sup>, Fredrik Serenius PhD<sup>i</sup>, Stef van Buuren PhD<sup>j,k</sup>, Samantha Johnson PhD<sup>e</sup>, Valérie Benhammou PhD<sup>a</sup>, Véronique Pierrat PhD<sup>a</sup>, Monique Kaminski MSc<sup>a</sup>, Laurence Foix L'Helias PhD<sup>a,l,m</sup>, Pierre-Yves Ancel PhD<sup>a,n</sup>, Neil Marlow FMedSci<sup>b</sup>

<sup>a</sup> *Université de Paris, CRESS, Obstetrical Perinatal and Pediatric Epidemiology Research Team, EPOPé, INSERM, INRAE, F-75004, Paris, France*

<sup>b</sup> *UCL Elizabeth Garrett Anderson Institute for Women's Health London, University College London, London, UK*

<sup>c</sup> *Department of Neonatology, Maternity Port Royal, Assistance Publique – Hôpitaux de Paris, Paris, France.*

<sup>d</sup> *Centre of Reproductive Epidemiology, Lund University, Lund, Sweden*

<sup>e</sup> *Department of Health Sciences, University of Leicester, Leicester, UK*

<sup>f</sup> *Department of Obstetrics and Gynecology, Lund University, Skåne University Hospital, Lund, Sweden*

<sup>g</sup> *Division of Pediatrics, Department of Clinical Science, Intervention, and Technology, Karolinska Institutet, Stockholm, Sweden*

<sup>h</sup> *Department of Neonatal Medicine, Karolinska University Hospital, Stockholm, Sweden*

<sup>i</sup> *Department of Women's and Children's Health, Uppsala University, Uppsala, Sweden*

<sup>j</sup> *Netherlands Organisation for Applied Scientific Research TNO, Leiden, Netherlands*

<sup>k</sup> *Methodology & Statistics, Utrecht University, Utrecht, Netherlands*

<sup>l</sup> *Sorbonne University, Paris, France*

<sup>m</sup> *Department of Neonatal Pediatrics, Trousseau Hospital, Assistance Publique – Hôpitaux de Paris, Paris, France.*

<sup>n</sup> *Assistance Publique – Hôpitaux de Paris, Clinical Investigation Center P1419, Assistance Publique-Hôpitaux de Paris, Paris, France*

---

## Abstract

This document contains acknowledgements and supplementary material for the article, “*Birth outcomes between 22 to 26 weeks' gestation in national population-based cohorts from Sweden, England and France*”, <https://doi.org/10.1111/apa.16084>.

## Contents

|          |                               |           |
|----------|-------------------------------|-----------|
| <b>1</b> | <b>Contributors</b>           | <b>2</b>  |
| <b>2</b> | <b>Acknowledgements</b>       | <b>2</b>  |
| 2.1      | EXPRESS . . . . .             | 2         |
| 2.2      | EPICure-2 . . . . .           | 3         |
| 2.3      | EPIPAGE-2 . . . . .           | 4         |
| <b>3</b> | <b>Ethical approvals</b>      | <b>4</b>  |
| <b>4</b> | <b>Data sharing statement</b> | <b>5</b>  |
| <b>5</b> | <b>Supplementary tables</b>   | <b>6</b>  |
| <b>6</b> | <b>Supplementary figures</b>  | <b>20</b> |

---

## 1. Contributors

**ASM:** Design of the study, data preparation, data harmonisation, statistical analysis, interpretation of results, initial draft of the manuscript, critical revision, redrafting and incorporation of comments into revisions, and final approval; ASM is the guarantor, had full access to all of the data in the study, and takes responsibility for the integrity of the data and the accuracy of the data analysis. **JZ:** Design of the study, interpretation of results, critical revision of the article, and redrafting and final approval of the version to be published. **KK:** Data acquisition, data preparation, data harmonisation, interpretation of results, critical revision of the article and final approval of the version to be published. **ESD:** Data acquisition, data harmonisation, interpretation of results, critical revision of the article and final approval of the version to be published. **KM:** Concept and design of the study, data acquisition, data harmonisation, interpretation of results, critical revision of the manuscript and final approval of the version to be published. **MN:** Data acquisition, data harmonisation, interpretation of results, critical revision of the manuscript and final approval of the version to be published. **FS:** Data acquisition, data harmonisation, interpretation of results, critical revision of the manuscript and final approval of the version to be published. **SvB:** Data harmonisation, critical revision of the manuscript, and redrafting and final approval of the version to be published. **SJ:** Data acquisition, data harmonisation, interpretation of results, critical revision of the manuscript and final approval of the version to be published. **VB:** Data acquisition, critical revision of the manuscript and final approval of the version to be published. **VP:** Data acquisition, data harmonisation, critical revision of the manuscript and final approval of the version to be published. **MK:** Design of the study, interpretation of results, critical revision of the manuscript and final approval of the version to be published. **LFLH:** Data acquisition, interpretation of results, critical revision of the manuscript and final approval of the version to be published. **PYA:** Concept and design of the study, data acquisition, data harmonisation, interpretation of results, critical revision of the manuscript and final approval of the version to be published. **NM:** Concept and design of the study, data acquisition, data harmonisation, interpretation of results, critical revision of the manuscript and final approval.

## 2. Acknowledgements

### 2.1. EXPRESS

We gratefully acknowledge all members of the EXPRESS Perinatal Group and the researchers and clinicians who contributed to the 2.5 year follow-up.

EXPRESS Perinatal Group Members: Mats Blennow, MD, PhD, Department of Pediatrics, Karolinska University Hospital, Huddinge, and Department of Clinical Investigation, Intervention, & Technology, Karolinska Institutet, Stockholm, Sweden; Uwe Ewald, MD, PhD, Department of Women's and Children's Health, Uppsala University, Uppsala, Sweden; Tomas Fritz, MD, Department of Obstetrics and Gynecology, Sahlgrenska University Hospital, Göteborg, Sweden; Per Åke Holmgren, MD, PhD, Department of Clinical Sciences, Obstetrics, and Gynecology, Umeå University, Umeå, Sweden; Annika Jeppsson, MD, PhD, Department of Obstetrics and Gynecology, Linköping University, Linköping, Sweden; Eva Lindberg, MD, Department of Pediatrics, Örebro University, Örebro, Sweden; Anita Lundqvist, PhD, Department of Health Sciences, Lund University, Lund, Sweden; Solveig Nordén Lindeberg, MD, PhD, Department of Obstetrics and Gynecology, Uppsala University; Elisabeth Olhager, MD, PhD, Department of Pediatrics, Linköping University; Ingrid Östlund, MD, PhD, Department of Obstetrics and Gynecology, Örebro University Hospital, Örebro; Marija Simic, MD, Department of Obstetrics and Gynecology, Karolinska University Hospital

---

\*Corresponding author

*Email addresses:* [andrei.morgan@inserm.fr](mailto:andrei.morgan@inserm.fr) (Andrei S. Morgan PhD), [jennifer.zeitlin@inserm.fr](mailto:jennifer.zeitlin@inserm.fr) (Jennifer Zeitlin PhD), [karin.kallen@med.lu.se](mailto:karin.kallen@med.lu.se) (Karin Källén PhD), [msn@leicester.ac.uk](mailto:msn@leicester.ac.uk) (Elizabeth S. Draper PhD), [karel.marsal@med.lu.se](mailto:karel.marsal@med.lu.se) (Karel Maršál PhD), [mikael.norman@ki.se](mailto:mikael.norman@ki.se) (Mikael Norman PhD), [fredrik.serenius@kbh.uu.se](mailto:fredrik.serenius@kbh.uu.se) (Fredrik Serenius PhD), [stef.vanbuuren@tno.nl](mailto:stef.vanbuuren@tno.nl) (Stef van Buuren PhD), [sjj19@leicester.ac.uk](mailto:sjj19@leicester.ac.uk) (Samantha Johnson PhD), [valerie.benhamou@inserm.fr](mailto:valerie.benhamou@inserm.fr) (Valérie Benhamou PhD), [veronique.pierrat@inserm.fr](mailto:veronique.pierrat@inserm.fr) (Véronique Pierrat PhD), [monique.kaminski@inserm.fr](mailto:monique.kaminski@inserm.fr) (Monique Kaminski MSc), [laurencefoix@gmail.com](mailto:laurencefoix@gmail.com) (Laurence Foix L'Helias PhD), [pierre-yves.ancel@inserm.fr](mailto:pierre-yves.ancel@inserm.fr) (Pierre-Yves Ancel PhD), [n.marlow@ucl.ac.uk](mailto:n.marlow@ucl.ac.uk) (Neil Marlow FMedSci)

Solna, Stockholm; Gunnar Sjörs, MD, PhD, Department of Pediatrics, Uppsala University; Lennart Stigson, MD, Department of Pediatrics, Sahlgrenska University Hospital. Writing committee members: Vineta Fellman, MD, PhD, Department of Pediatrics, Clinical Sciences Lund, Lund University; Lena Hellström-Westas, MD, PhD, Department of Women's and Children's Health, Uppsala University; Mikael Norman, MD, PhD, Department of Pediatrics, Karolinska University Hospital, Huddinge and Department of Clinical Investigation, Intervention & Technology, Karolinska Institutet, Stockholm; Magnus Westgren, MD, PhD, Department of Obstetrics and Gynecology, Karolinska University Hospital Huddinge. Expert group members: Gerd Holmström, MD, PhD, Department of Ophthalmology, Uppsala University; the late Ricardo Laurini, MD, PhD, Department of Pathology, Nordland Hospital, Bodö, Norway; Karin Stjernqvist, PhD, Department of Psychology, Lund University. Steering group and writing committee members: Karin Källén, PhD, Centre of Reproductive Epidemiology, Lund University; Hugo Lagercrantz, MD, PhD, Department of Women and Child Health, Karolinska Institute, Stockholm, Astrid Lindgren Children's Hospital, Stockholm; Karel Maršál, MD, PhD, Department of Obstetrics and Gynecology, Clinical Sciences Lund, Lund University; Fredrik Serenius, MD, PhD, Department of Clinical Sciences, Pediatrics, Umeå University; the late Margareta Wennergren, MD, PhD, Department of Obstetrics and Gynecology, Sahlgrenska University Hospital. Steering group members: the late Tore Nilstun, PhD, Department of Medical Ethics, Lund University; Petra Otterblad Olausson, PhD, Centre of Epidemiology, The National Board of Health and Welfare, Stockholm; Bo Strömberg, MD, PhD, Department of Pediatrics, Uppsala University.

Researchers and clinicians who contributed to the EXPRESS 2.5-year follow-up. Main coordinator: Dr Strömberg. Chief psychologist: Dr Stjernqvist. Pediatricians: Drs Blennow, Norman, Vollmer, Serenius, Ewald, Strömberg, Fellman, Stigson, Olhager, and Lindberg); Department of Women's and Children's Health, Uppsala University, Uppsala (Lena Hellström-Westas, MD, PhD, and Gunnar Sjörs, MD, PhD); Department of Pediatrics, Clinical Sciences Lund, Lund University, Lund (Kristina Forsblad, MD); Department of Pediatrics, Institute of Clinical Sciences, Sahlgrenska Academy, Gothenburg University, Gothenburg (Maria Hafström, MD, PhD); Pediatric Clinic, Linköping University Hospital, Linköping (Ulla Lindskog, MD). Ophthalmologists: Dr Holmström; Department of Neuroscience/Ophthalmology, Uppsala University, Uppsala (Dordi Austeng, MD, PhD); Department of Ophthalmology, Institute of Neuroscience and Physiology, Sahlgrenska Academy Gothenburg University, Gothenburg (Ann Hellström, MD, PhD); Department of Ophthalmology, Linköping University, Linköping (Peter Jakobsson, MD, PhD); Department of Ophthalmology, Clinical Sciences Lund, Lund University, Lund (Kristina Tornqvist, MD, PhD); Department of Ophthalmology, Karolinska Institutet, Stockholm (Gunnar Lindgärde, MD, PhD, and Agneta Wallin, MD, PhD); and Department of Ophthalmology, Institute of Clinical Sciences, Umeå University, Umeå (Kent Johansson, MD, PhD). Psychologists: Dr Stjernqvist; Department of Psychology, Lund University, Lund (Johanna Månsson, MSc); Department of Pediatrics, Skåne University Hospital, Lund (Anette Carnemalm, MSc, and Christina Helgason, MSc); Pediatric Clinic, Umeå University Hospital, Umeå (Milly Marken, MSc); Uppsala University Children's Hospital, Uppsala (Ylva Fredriksson, MSc, and Ingela Helling, MSc); Queen Silvia Children's Hospital, Gothenburg (Eva Rehn, MSc); Pediatric Clinic, Örebro University Hospital, Örebro (Kari Ylimäinen, MSc); Pediatric Clinic, Linköping University Hospital, Linköping (Anna Lönegren, MSc, Margreth Ericsson, MSc, Anna Nyrén, MSc, and Carin Johansson Wiemerö, MSc); Department of Women's and Children's Health, Karolinska Institutet, Stockholm (Birgitta Böhm, MSc, PhD); and Department of Child and Youth Psychiatry, Stockholm County Council, Stockholm (Eva Eklöf, MSc, Christina Lindqvist, MSc, Irmgard Obwexer, MSc, and Claudia Aulin-Villa, MSc). Nurses, local study coordinators: Pediatric Clinic, Umeå University Hospital, Umeå (Barbro Fossmo, RN); Uppsala University Children's Hospital, Uppsala (Cecilia Ewald, RN); Pediatric Clinic, Linköping University Hospital, Linköping (Christina Fuxin, RN); Department of Neonatology, Karolinska University Hospital, Stockholm (Lena Swartling, RN); and Pediatric Clinic, Skåne University Hospital, Lund (Ann-Cathrine Berg, RN). Telephone interviews: Ms Pia Lundquist. Technical assistance in data collection: Department of Obstetrics and Gynecology, Clinical Sciences Lund, Lund University, Lund (Grozda Pajic).

## 2.2. EPICure-2

For the perinatal data collection, we are grateful for the cooperation of the Confidential Enquiry into Maternal and Child Health (CEMACH); for the help of Kerry Montoute, Elizabeth Rushmer, Rachel Lee,

and Catherine Kelly in the EPICure-2 office at Homerton University Hospital NHS Foundation Trust; for database development by Martin Perkins and data entry by Helen Holden at the University of Leicester; and particularly for the staff of contributing hospitals. The perinatal component of the EPICure studies was sponsored by Queen Mary, University of London.

For the 3 year follow-up, we thank Heather Palmer for her contribution to the management and coordination of the study and contact tracing. Assessors were Tamanna Moore, Philippa Chisholm (EPICure research fellows), Haytham Ali, Katie Banerjee, Jackie Birch, Richard Cooke, Pat Dulson, Sandeep Dharmaraj, Tony Hart, Charlotte Huddy, Angela Huertas, Anoo Jain, Sam Johnson, Julia Lilley, Caroline McFerran, Katherine Martin, Robin Miralles, Vijay Palanivel, Sarah Skinner, Aung Soe, and Nick Wood. The EPICure outcome studies were sponsored by the University of Nottingham (until September 2008) and subsequently by University College London.

Independent members of EPICure studies steering committee: Peter Brocklehurst (chairman), Jane Abbott, Andrew Bush, Richard Cooke, Noreen Maconochie, Alison Matthews, David Matthews, Richard Morton, Maggie Redshaw, David Taylor, Nigel Turner, Diane Turner, Patrick Walsh.

### *2.3. EPIPAGE-2*

We gratefully acknowledge the input of the EPIPAGE-2 two year follow-up study group whose members included the following. Alsace: D Astruc, P Kuhn, B Langer, J Matis, C Ramousset; Aquitaine: X Hermandorena, P Chabanier, L Joly-Pedespan, MJ Costedoat, A Leguen; Auvergne: B Lecomte, D Lemery, F Vendittelli; Basse-Normandie: G Beucher, M Dreyfus, B Guillois, Y Toure; Bourgogne: A Burguet, S Couvreur, JB Gouyon, P Sagot, N Colas; Bretagne: J Sizun, A Beuchée, P Pladys, F Rouget, RP Dupuy, D Soupre, F Charlot, S Roudaut; Centre: A Favreau, E Saliba, L Reboul; Champagne-Ardenne: N Bednarek, P Morville, V Verrière; Franche-Comté: G Thiriez, C Balamou; Haute-Normandie: L Marpeau, S Marret, C Barbier; Ile-de-France: G Kayem, X Durrmeyer, M Granier, M Ayoubi, O Baud, B Carbonne, L Foix L'Hélias, F Goffinet, PH Jarreau, D Mitanchez, P Boileau, C Duffaut, E Lorthe, L Cornu, R Moras; Languedoc-Roussillon: P Boulot, G Cambonie, H Daudé, A Badessi, N Tsaoussis; Limousin: A Bédu, F Mons, C Bahans; Lorraine: MH Binet, J Fresson, JM Hascoët, A Milton, O Morel, R Vieux, L Hilpert; Midi-Pyrénées: C Alberge, C Arnaud, C Vayssière, M Baron; Nord-Pas-de-Calais: ML Charkaluk, V Pierrot, D Subtil, P Truffert, S Akowanou; PACA et Corse: C D'Ercole, C Gire, U Simeoni, A Bongain, M Deschamps; Pays de Loire: B Branger, JC Rozé, N Winer, V Rouger, C Dupont; Picardie: J Gondry, G Krim, B Baby; Rhône-Alpes: M Debeir, O Claris, JC Picaud, S Rubio-Gurung, C Cans, A Ego, T Debillon, H Patural, A Rannaud; Guadeloupe: E Janky, A Poulichet, JM Rosenthal, E Coliné; Guyane: A Favre, N Joly; Martinique: S Châlons, J Pignol, PL Laurence; La Réunion: PY Robillard, S Samperiz, D Ramful. INSERM UMR 1153: PY Ancel, V Benhammou, B Blondel, M Bonet, A Brinis, A Coquelin, M Durox, M Kaminski, K Khemache, B Khoshnood, C Lebeaux, L Marchand-Martin, J Rousseau, MJ Saurel-Cubizolles, D Tran, J Zeitlin.

We also acknowledge the input of the EPIPAGE-2 Extreme Preterm and Obstetric writing groups, whose members include: Pierre-Yves Ancel, Catherine Arnaud, Chloé Arthuis, Pierre Bétremieux, Alain Beuchée, Julie Blanc, Pascal Boileau, Laurence Boujenah, Laurence Caeymaex, Olivier Claris, Thierry Debillon, Pierre Delorme, Claude D'Ercole, Thomas Desplanches, Caroline Diguisto, Laurence Foix-L'Hélias, Aurélie Garbi, Géraldine Gascoin, Catherine Gire, François Goffinet, Isabelle Guellec, Pierre-Henri Jarreau, Monique Kaminski, Gilles Kayem, Pierre Kuhn, Bruno Langer, Mathilde Letouzey, Elsa Lorthe, Stéphane Marret, Isabelle Monier, Andrei Morgan, Véronique Pierrat, Jean-Christophe Rozé, Florence Rouget, Thomas Schmitz, Loïc Sentilhes, Damien Subtil, Héloïse Torchin, Barthélémy Tosello, Christophe Vayssière, Norbert Winer, Jennifer Zeitlin

### **3. Ethical approvals**

The EXPRESS study was approved by the Regional Research Ethics Board, Lund University, Lund, Sweden (reference 42/2004). The parents provided oral informed consent for perinatal data acquisition and written consent for examination of their children and data acquisition for the follow-up study. The

Regional Research Ethics Board of Lund University approved transfer of the anonymised data set used for this analysis (reference 2018/686).

The EPICure-2 study was approved by the East London Research Committee (ref 05/Q0605/107). Further approval was obtained (PIAG 3-07(f)/2005) to collect data without explicit consent. For surviving infants, consent was sought to use the data, maintain contact with the family, and to arrange for long term developmental assessment. The 3 year follow-up study was approved by the Northern and Yorkshire research ethics committee (ref 08/H0903/51). Permission for transfer of the anonymised data set used in this analysis was provided by the Data Owner and Study Sponsor.

The EPIPAGE-2 study was approved by the French National Data Protection Authority (CNIL, ref 911009) and by the relevant ethics committees: Consultative Committee on the Treatment of Data on Personal Health for Research Purposes (reference 10.626); Committee for the Protection of People Participating in Biomedical Research (reference CPP SC-2873). All data harmonisation and analyses were carried out in Paris, France.

#### **4. Data sharing statement**

The EXPRESS data are available for other researchers subject to approval from the relevant ethics committee and the EXPRESS Study Steering Committee. Researchers should contact the Chair of the Steering Committee (currently, Professor Mikael Norman) using contact details available online at <https://express-study.se/english/>.

The EPICure studies are subject to a data sharing policy that may be downloaded from <http://www.epicure.ac.uk>.

The EPIPAGE studies are subject to a data sharing policy that may be downloaded from <http://epipage2.inserm.fr/index.php/en/>.

Further information about all three cohorts is available on the RECAP Preterm platform at <https://platform.recap-preterm.eu/>. This platform contains detailed information, including data dictionaries, about a range of preterm birth cohorts carried out in Europe, and provides a mechanism for investigations to be facilitated.

## 5. Supplementary tables

Table S1: Variables from EXPRESS, EPICure-2 and EPIPAGE-2 cohorts harmonised for inclusion.

| Variable                                    | EXPRESS                                                                                                                                                                                                                 | EPICure-2                                                                                                                                                                                                                                               | EPIPAGE-2                                                                                                                                                                                                                                 | Harmonised study version                             |
|---------------------------------------------|-------------------------------------------------------------------------------------------------------------------------------------------------------------------------------------------------------------------------|---------------------------------------------------------------------------------------------------------------------------------------------------------------------------------------------------------------------------------------------------------|-------------------------------------------------------------------------------------------------------------------------------------------------------------------------------------------------------------------------------------------|------------------------------------------------------|
| Gestational age (weeks)                     | 1) ultrasound at 17-18 weeks GA; 2) last menstrual period; 3) other (unspecified).                                                                                                                                      | 1) Earliest ultrasound (normally performed at 11-12 weeks GA); 2) last menstrual period; 3) clinical estimation                                                                                                                                         | Best obstetric estimate combining first trimester ultrasound (normally at 11-12 weeks GA) and last menstrual period.                                                                                                                      | Defined according to hierarchy shown for each cohort |
| Fetal sex                                   | Male / Female                                                                                                                                                                                                           | Male / Female                                                                                                                                                                                                                                           | Male / Female                                                                                                                                                                                                                             | Male / Female                                        |
| Maternal age (years)                        | (continuous)                                                                                                                                                                                                            | (continuous)                                                                                                                                                                                                                                            | (continuous)                                                                                                                                                                                                                              | (continuous)                                         |
| Pre-pregnancy diabetes                      | Yes = Type I or II; No                                                                                                                                                                                                  | Yes = Type I or II; No                                                                                                                                                                                                                                  | Yes = Type I or II; No                                                                                                                                                                                                                    | Yes / No                                             |
| Pre-pregnancy hypertension                  | Yes = hypertension diagnosed before pregnancy or at first booking ; No                                                                                                                                                  | Yes = Essential hypertension, on treatment at first booking ; No                                                                                                                                                                                        | Yes = persistent hypertension before the pregnancy ; No                                                                                                                                                                                   | Yes / No                                             |
| Nulliparous                                 | No previous deliveries of live births (at any GA) or still births ( $\geq 28$ weeks GA)                                                                                                                                 | No previous deliveries ( $\geq 24$ weeks GA)                                                                                                                                                                                                            | No previous deliveries ( $\geq 22$ weeks GA)                                                                                                                                                                                              | No previous deliveries (as defined by the cohorts)   |
| Pre-eclampsia                               | Yes = BP $\geq 140/90$ and proteinuria $\geq 0.3g/24$ hours or $0.3g/1$ ; No                                                                                                                                            | Yes / No                                                                                                                                                                                                                                                | Yes = BP $\geq 140/90$ and proteinuria $\geq 0.3g/24$ hours ; No                                                                                                                                                                          | Yes / No                                             |
| Placental abruption                         | Yes / No                                                                                                                                                                                                                | Yes / No                                                                                                                                                                                                                                                | Yes / No                                                                                                                                                                                                                                  | Yes / No                                             |
| Labour onset                                | Spontaneous / induced / none                                                                                                                                                                                            | Spontaneous / induced / none                                                                                                                                                                                                                            | Spontaneous / induced / none                                                                                                                                                                                                              | Spontaneous / Induced / None                         |
| Level of neonatal unit at delivery hospital | Levels 1 (basic neonatal care for term and near-term babies), 2 (County hospital with some neonatal care; most have 28 weeks' GA as a lower limit of care), and 3 (Regional university hospital with no lower GA limit) | Levels 1 (no onsite neonatal facilities other than for stabilisation), 2 (some neonatal care with a lower limit of 27 weeks' GA for singletons or 28 weeks' GA for multiples) and 3 (full intensive care provided to all babies with no lower GA limit) | Levels 1 (no onsite neonatal facilities), 2 (including 2a and 2b, providing stabilisation and/or short term neonatal care for late preterm and term babies only) and 3 (providing ongoing neonatal intensive care with no lower GA limit) | Levels 1, 2 and 3                                    |

(Continued on next page ...)

Variables from EXPRESS, EPIcure-2 and EPIPAGE-2 cohorts harmonised for inclusion (continued).

| Variable                 | EXPRESS                                                                                                                                                                                                                                                 | EPIcure-2                                                                | EPIPAGE-2                                                                                                      | Harmonised study version                                                          |
|--------------------------|---------------------------------------------------------------------------------------------------------------------------------------------------------------------------------------------------------------------------------------------------------|--------------------------------------------------------------------------|----------------------------------------------------------------------------------------------------------------|-----------------------------------------------------------------------------------|
| Antenatal steroids (any) | Yes / No                                                                                                                                                                                                                                                | Yes / No                                                                 | Yes / No                                                                                                       | Yes / No                                                                          |
| Mode of delivery         | Vaginal / Caesarean                                                                                                                                                                                                                                     | Vaginal / Caesarean                                                      | Vaginal / Caesarean                                                                                            | Vaginal / Caesarean                                                               |
| Birth weight (g)         | (continuous)                                                                                                                                                                                                                                            | (continuous)                                                             | (continuous)                                                                                                   | (continuous)                                                                      |
| Congenital anomalies     | Yes = Classified according to the WHO International Classification of Diseases, 10th revision (excluding: dislocation of the hip (Q65.0-Q65.5), preauricular tags (Q17.0), undescended testes (Q53.0-Q53.9), and patent ductus arteriosus (Q25.0)) / No | Yes = significant malformation noted at delivery / No                    | Yes = life-threatening malformation noted at delivery, retrospectively classified by committee of experts / No | Yes / No                                                                          |
| Worst grade of IVH       | Grades 1-4 according to the classification of Papile <sup>1</sup>                                                                                                                                                                                       | Grades 1-4 according to the classification of Papile <sup>1</sup>        | Grades 1-4 according to the classification of Papile <sup>1</sup>                                              | Grades 1-4 according to the classification of Papile <sup>1</sup>                 |
| Cystic PVL               | Yes / No                                                                                                                                                                                                                                                | Yes / No                                                                 | Yes / No                                                                                                       | Yes / No                                                                          |
| PDA treated surgically   | Yes / No                                                                                                                                                                                                                                                | Yes / No                                                                 | Yes / No                                                                                                       | Yes / No                                                                          |
| NEC treated surgically   | Yes / No                                                                                                                                                                                                                                                | Yes / No                                                                 | Yes / No                                                                                                       | Yes / No                                                                          |
| BPD                      | None or mild; moderate; severe <sup>2</sup>                                                                                                                                                                                                             | None or mild; moderate; severe <sup>2</sup>                              | None or mild; moderate; severe <sup>2</sup>                                                                    | None or mild; moderate; severe <sup>2</sup>                                       |
| Stage of ROP             | Stages 1 to 5 according to the international classification <sup>3</sup>                                                                                                                                                                                | Stages 1 to 5 according to the international classification <sup>3</sup> | Stages 1 to 5 according to the international classification <sup>3</sup>                                       | Stages 1 to 5 according to the international classification <sup>3</sup>          |
| Treated ROP              | Yes / No                                                                                                                                                                                                                                                | Yes / No                                                                 | Yes / No                                                                                                       | Yes / No                                                                          |
| Blindness                | Yes / No                                                                                                                                                                                                                                                | Yes / No                                                                 | Yes / No                                                                                                       | Yes / No                                                                          |
| Deafness                 | Yes / No                                                                                                                                                                                                                                                | Yes / No                                                                 | Yes / No                                                                                                       | Yes / No                                                                          |
| Functional motor level   | None; mild (able to walk without an aid), moderate (able to walk with an aid) and severe (unable to walk, even with an aid). <sup>4</sup>                                                                                                               | None; GMFCS levels 1 to 5, coded separately <sup>5</sup>                 | None; GMFCS levels coded as 1, 2, 3-4 combined, and 5 <sup>6</sup>                                             | no disability ; mild disability (GMFCS 1); moderate (GMFCS 2); severe (GMFCS 3-5) |

GA: gestational age. BP: blood pressure. WHO: World Health Organisation. IVH: intraventricular haemorrhage.

PVL periventricular leukomalacia. PDA: patent ductus arteriosus. NEC: necrotising enterocolitis.

BPD: bronchopulmonary dysplasia. ROP: retinopathy of prematurity. GMFCS: Gross Motor Functional Classification System<sup>7</sup>

Table S2: STROBE checklist for “Outcomes of births between 22 and 26 weeks of gestation in national population-based cohorts from Sweden, England and France”

|                              | <b>Item No</b> | <b>Recommendation</b>                                                                                                                                                                 | <b>Section (notes)</b>                                                                                                                                                                     |
|------------------------------|----------------|---------------------------------------------------------------------------------------------------------------------------------------------------------------------------------------|--------------------------------------------------------------------------------------------------------------------------------------------------------------------------------------------|
| <b>Title and abstract</b>    | 1              | (a) Indicate the study’s design with a commonly used term in the title or the abstract                                                                                                | Title (“population-based cohorts”; abstract (“We used harmonised data from three European cohorts to investigate timing of survival differences” with further details in methods section). |
|                              |                | (b) Provide in the abstract an informative and balanced summary of what was done and what was found                                                                                   | Abstract: Methods and Results sections.                                                                                                                                                    |
| <b>Introduction</b>          |                |                                                                                                                                                                                       |                                                                                                                                                                                            |
| Background/<br>rationale     | 2              | Explain the scientific background and rationale for the investigation being reported                                                                                                  | Background (paragraphs 1 and 2).                                                                                                                                                           |
| Objectives                   | 3              | State specific objectives, including any prespecified hypotheses                                                                                                                      | Background (second paragraph).                                                                                                                                                             |
| <b>Methods</b>               |                |                                                                                                                                                                                       |                                                                                                                                                                                            |
| Study design                 | 4              | Present key elements of study design early in the paper                                                                                                                               | Methods section.                                                                                                                                                                           |
| Setting                      | 5              | Describe the setting, locations, and relevant dates, including periods of recruitment, exposure, follow-up, and data collection                                                       | Methods (“Data sources” section).                                                                                                                                                          |
| Participants                 | 6              | (a) Give the eligibility criteria, and the sources and methods of selection of participants. Describe methods of follow-up                                                            | Methods (“Data sources” and “Populations included” sections).                                                                                                                              |
|                              |                | (b) For matched studies, give matching criteria and number of exposed and unexposed                                                                                                   | N/A                                                                                                                                                                                        |
| Variables                    | 7              | Clearly define all outcomes, exposures, predictors, potential confounders, and effect modifiers. Give diagnostic criteria, if applicable                                              | Methods (“Data harmonisation” and “Outcomes” sections); supplementary table S1.                                                                                                            |
| Data sources/<br>measurement | 8              | For each variable of interest, give sources of data and details of methods of assessment (measurement). Describe comparability of assessment methods if there is more than one group. | Methods (“Data harmonisation” and “Outcomes” sections); supplementary table S1.                                                                                                            |
| Bias                         | 9              | Describe any efforts to address potential sources of bias                                                                                                                             | Methods (“Populations included” and “Data harmonisation” sections); supplementary table S1.                                                                                                |
| Study size                   | 10             | Explain how the study size was arrived at                                                                                                                                             | Methods (“Data sources” and “Populations included” sections).                                                                                                                              |
| Quantitative variables       | 11             | Explain how quantitative variables were handled in the analyses. If applicable, describe which groupings were chosen and why                                                          | Methods (“Data sources”).                                                                                                                                                                  |

Continued on next page...



Strobe checklist (continued)

|                     | <b>Item No</b> | <b>Recommendation</b>                                                                                                                                                                                        | <b>Section (notes)</b>                                                                                                                                                                               |
|---------------------|----------------|--------------------------------------------------------------------------------------------------------------------------------------------------------------------------------------------------------------|------------------------------------------------------------------------------------------------------------------------------------------------------------------------------------------------------|
| Statistical methods | 12             | (a) Describe all statistical methods, including those used to control for confounding                                                                                                                        | Methods (“Statistical analysis” section).                                                                                                                                                            |
|                     |                | (b) Describe any methods used to examine subgroups and interactions                                                                                                                                          | Methods (“Statistical analysis” and “Sensitivity analyses” sections).                                                                                                                                |
|                     |                | (c) Explain how missing data were addressed                                                                                                                                                                  | Methods (“Statistical analysis”, second paragraph).                                                                                                                                                  |
|                     |                | (d) If applicable, explain how loss to follow-up was addressed                                                                                                                                               | N/A                                                                                                                                                                                                  |
|                     |                | (e) Describe any sensitivity analyses                                                                                                                                                                        | Methods (“Sensitivity analyses” section).                                                                                                                                                            |
| <b>Results</b>      |                |                                                                                                                                                                                                              |                                                                                                                                                                                                      |
| Participants        | 13             | (a) Report numbers of individuals at each stage of study—eg numbers potentially eligible, examined for eligibility, confirmed eligible, included in the study, completing follow-up, and analysed            | Results (paragraph 1) and figures 1 to 4 in the risk tables.                                                                                                                                         |
|                     |                | (b) Give reasons for non-participation at each stage                                                                                                                                                         | Figures 1 to 4                                                                                                                                                                                       |
|                     |                | (c) Consider use of a flow diagram                                                                                                                                                                           | N/A                                                                                                                                                                                                  |
| Descriptive data    | 14             | (a) Give characteristics of study participants (eg demographic, clinical, social) and information on exposures and potential confounders                                                                     | Results (“Maternal characteristics” and “Fetal characteristics” sections), and tables 1 and 2 and S4 to S5.                                                                                          |
|                     |                | (b) Indicate number of participants with missing data for each variable of interest                                                                                                                          | Results (“Neonatal outcomes at discharge” and “Post-discharge outcomes” sections), tables 4 and 5, and S6 to S9.                                                                                     |
|                     |                | (c) Summarise follow-up time (eg, average and total amount)                                                                                                                                                  | Figures 1 to 4.                                                                                                                                                                                      |
| Outcome data        | 15             | Report numbers of outcome events or summary measures over time                                                                                                                                               | Figures 1 to 4.                                                                                                                                                                                      |
| Main results        | 16             | (a) Give unadjusted estimates and, if applicable, confounder-adjusted estimates and their precision (eg, 95% confidence interval). Make clear which confounders were adjusted for and why they were included | Main results (unadjusted and adjusted) are presented in tables 3 and S3, and S10 to S11; confounders are discussed in the methods (“Statistical analysis” section) and listed in the table captions. |
|                     |                | (b) Report category boundaries when continuous variables were categorized                                                                                                                                    | Methods (“Statistical analysis” section) and tables 1 to 2 and S4 to S5.                                                                                                                             |
|                     |                | (c) If relevant, consider translating estimates of relative risk into absolute risk for a meaningful time period                                                                                             | N/A                                                                                                                                                                                                  |
| Other analyses      | 17             | Report other analyses done — eg analyses of subgroups and interactions, and sensitivity analyses                                                                                                             | Results (“Sensitivity analyses” section) and tables S10 and S11.                                                                                                                                     |
| <b>Discussion</b>   |                |                                                                                                                                                                                                              |                                                                                                                                                                                                      |

Continued on next page...

Strobe checklist (continued)

|                          | <b>Item No</b> | <b>Recommendation</b>                                                                                                                                                      | <b>Section (notes)</b>                            |
|--------------------------|----------------|----------------------------------------------------------------------------------------------------------------------------------------------------------------------------|---------------------------------------------------|
| Key results              | 18             | Summarise key results with reference to study objectives                                                                                                                   | Discussion (paragraph 1)                          |
| Limitations              | 19             | Discuss limitations of the study, taking into account sources of potential bias or imprecision. Discuss both direction and magnitude of any potential bias                 | Discussion (“Strengths and limitations” section). |
| Interpretation           | 20             | Give a cautious overall interpretation of results considering objectives, limitations, multiplicity of analyses, results from similar studies, and other relevant evidence | Discussion (“Interpretation” section).            |
| Generalisability         | 21             | Discuss the generalisability (external validity) of the study results                                                                                                      | Discussion (“Generalisability” section).          |
| <b>Other information</b> |                |                                                                                                                                                                            |                                                   |
| Funding                  | 22             | Give the source of funding and the role of the funders for the present study and, if applicable, for the original study on which the present article is based              | Funding section.                                  |

a Give information separately for exposed and unexposed groups.

Note: An Explanation and Elaboration article discusses each checklist item and gives methodological background and published examples of transparent reporting. The STROBE checklist is best used in conjunction with this article<sup>8</sup> (freely available on the Web sites of PLoS Medicine at <http://www.plosmedicine.org/>, Annals of Internal Medicine at <http://www.annals.org/>, and Epidemiology at <http://www.epidem.com/>). Information on the STROBE Initiative is available at <http://www.strobe-statement.org>.

Table S3: Chi-squared p-values testing scaled Schoenfeld residuals (to assess the proportional hazards assumption) for the EPIcure-2 (England, 2006) and EPIPAGE-2 (France, 2011) cohorts in comparison to EXPRESS (Sweden, 2004-07), along with residual tests for the overall model, from Cox regression for unadjusted and adjusted (for maternal age, parity, pre-existing diabetes and hypertension, pre-eclampsia, placental abruption, spontaneous labour, multiple pregnancy, sex, and birth weight) models examining the mortality of babies born extremely preterm according to different baseline populations.

| GA           | Population                          | Unadjusted results |           |               | Adjusted results |           |               |
|--------------|-------------------------------------|--------------------|-----------|---------------|------------------|-----------|---------------|
|              |                                     | EPIcure-2          | EPIPAGE-2 | Overall model | EPIcure-2        | EPIPAGE-2 | Overall model |
| <b>22-23</b> | Fetuses alive at maternal admission | 0.004              | 0.469     | <0.001        | 0.004            | 0.250     | <0.001        |
|              | Live births                         | <0.001             | 0.702     | <0.001        | <0.001           | 0.982     | <0.001        |
|              | Survived to 1 hour                  | 0.060              | 0.381     | 0.151         | 0.005            | 0.063     | 0.085         |
|              | Survived to 1 day                   | 0.903              | 0.433     | 0.725         | 0.990            | 0.486     | 0.511         |
|              | Survived to 7 days                  | 0.557              | 0.147     | 0.178         | 0.561            | 0.118     | 0.356         |
|              | Survived to 28 days                 | 0.229              | 0.258     | 0.375         | >0.999           | >0.999    | >0.999        |
| <b>24</b>    | Fetuses alive at maternal admission | <0.001             | <0.001    | <0.001        | <0.001           | <0.001    | <0.001        |
|              | Live births                         | <0.001             | <0.001    | <0.001        | <0.001           | <0.001    | <0.001        |
|              | Survived to 1 hour                  | 0.036              | 0.010     | 0.036         | 0.075            | 0.019     | 0.206         |
|              | Survived to 1 day                   | 0.022              | 0.013     | 0.036         | 0.034            | 0.022     | 0.029         |
|              | Survived to 7 days                  | 0.055              | 0.022     | 0.066         | 0.194            | 0.089     | 0.503         |
|              | Survived to 28 days                 | 0.461              | 0.015     | 0.029         | 0.416            | 0.012     | 0.423         |
| <b>25</b>    | Fetuses alive at maternal admission | 0.757              | 0.834     | 0.951         | 0.522            | 0.446     | 0.025         |
|              | Live births                         | 0.793              | 0.967     | 0.890         | 0.921            | 0.708     | 0.425         |
|              | Survived to 1 hour                  | 0.637              | 0.767     | 0.888         | 0.818            | 0.943     | 0.197         |
|              | Survived to 1 day                   | 0.484              | 0.725     | 0.744         | 0.721            | 0.976     | 0.188         |
|              | Survived to 7 days                  | 0.398              | 0.056     | 0.077         | 0.363            | 0.075     | 0.101         |
|              | Survived to 28 days                 | 0.022              | 0.030     | 0.053         | 0.016            | 0.030     | 0.263         |
| <b>26</b>    | Fetuses alive at maternal admission | 0.822              | 0.671     | 0.898         | 0.510            | 0.444     | 0.112         |
|              | Live births                         | 0.539              | 0.490     | 0.783         | 0.278            | 0.268     | 0.200         |
|              | Survived to 1 hour                  | 0.747              | 0.855     | 0.943         | 0.494            | 0.593     | 0.123         |
|              | Survived to 1 day                   | 0.029              | 0.132     | 0.088         | 0.019            | 0.061     | 0.128         |
|              | Survived to 7 days                  | 0.455              | 0.478     | 0.741         | 0.235            | 0.327     | 0.548         |
|              | Survived to 28 days                 | 0.654              | 0.324     | 0.152         | >0.999           | >0.999    | >0.999        |

Notes: GA: gestational age at delivery.

Table S4: Baseline data for 22-23 and 24 week gestational age fetuses alive at maternal admission to hospital from the EXPRESS (Sweden, 2004-06), EPICure-2 (England, 2006) and EPIPAGE-2 (France, 2011) cohorts.

| Variable                                           | 22-23 weeks of gestational age |              |                |                |                |                | 24 weeks of gestational age |              |                |                |                |                |         |
|----------------------------------------------------|--------------------------------|--------------|----------------|----------------|----------------|----------------|-----------------------------|--------------|----------------|----------------|----------------|----------------|---------|
|                                                    | EXPRESS<br>n                   | EXPRESS<br>% | EPICure-2<br>n | EPICure-2<br>% | EPIPAGE-2<br>n | EPIPAGE-2<br>% | EXPRESS<br>n                | EXPRESS<br>% | EPICure-2<br>n | EPICure-2<br>% | EPIPAGE-2<br>n | EPIPAGE-2<br>% | p-value |
| <b>Level of neonatal care at delivery hospital</b> |                                |              |                |                |                |                |                             |              |                |                |                |                |         |
| 1                                                  | 9                              | 4.3          | 90             | 13.6           | 45             | 12.3           | 2                           | 1.4          | 51             | 10.5           | 16             | 6.5            | <0.001  |
| 2                                                  | 70                             | 33.5         | 266            | 40.1           | 156            | 42.6           | 11                          | 7.6          | 154            | 31.7           | 48             | 19.5           |         |
| 3                                                  | 130                            | 62.2         | 308            | 46.4           | 165            | 45.1           | 131                         | 91           | 281            | 57.8           | 182            | 74.0           |         |
| Missing                                            | 0                              | -            | 11             | -              | 0              | -              | 2                           | -            | 7              | -              | 0              | -              |         |
| <b>Exposure to antenatal steroids</b>              |                                |              |                |                |                |                |                             |              |                |                |                |                |         |
| No                                                 | 80                             | 39.8         | 421            | 62.7           | 327            | 95.9           | 7                           | 5.0          | 77             | 15.7           | 121            | 52.2           | <0.001  |
| Yes                                                | 121                            | 60.2         | 250            | 37.3           | 14             | 4.1            | 134                         | 95.0         | 412            | 84.3           | 111            | 47.8           |         |
| Missing                                            | 8                              | -            | 4              | -              | 25             | -              | 5                           | -            | 4              | -              | 14             | -              |         |
| <b>Placental abruption</b>                         |                                |              |                |                |                |                |                             |              |                |                |                |                |         |
| No                                                 | 183                            | 91.0         | 629            | 93.6           | 347            | 97.7           | 124                         | 93.2         | 463            | 94.3           | 235            | 97.5           | 0.1     |
| Yes                                                | 18                             | 9.0          | 43             | 6.4            | 8              | 2.3            | 9                           | 6.8          | 28             | 5.7            | 6              | 2.5            |         |
| Missing                                            | 8                              | -            | 3              | -              | 11             | -              | 13                          | -            | 2              | -              | 5              | -              |         |
| <b>Multiple birth</b>                              |                                |              |                |                |                |                |                             |              |                |                |                |                |         |
| No                                                 | 161                            | 77           | 485            | 71.9           | 249            | 68.0           | 114                         | 78.1         | 366            | 74.2           | 177            | 72.0           | 0.406   |
| Yes                                                | 48                             | 23           | 190            | 28.1           | 117            | 32.0           | 32                          | 21.9         | 127            | 25.8           | 69             | 28.0           |         |
| <b>Delivery type</b>                               |                                |              |                |                |                |                |                             |              |                |                |                |                |         |
| Vaginal                                            | 189                            | 90.4         | 661            | 98.1           | 343            | 96.9           | 79                          | 54.1         | 426            | 86.4           | 208            | 88.9           | <0.001  |
| Caesarean                                          | 20                             | 9.6          | 13             | 1.9            | 11             | 3.1            | 67                          | 45.9         | 67             | 13.6           | 26             | 11.1           |         |
| Missing                                            | 0                              | -            | 1              | -              | 12             | -              | 0                           | -            | 0              | -              | 12             | -              |         |
| <b>Sex</b>                                         |                                |              |                |                |                |                |                             |              |                |                |                |                |         |
| Male                                               | 113                            | 54.3         | 374            | 55.7           | 208            | 57.0           | 78                          | 53.4         | 253            | 51.3           | 127            | 52.0           | 0.903   |
| Female                                             | 95                             | 45.7         | 297            | 44.3           | 157            | 43.0           | 68                          | 46.6         | 240            | 48.7           | 117            | 48.0           |         |
| Missing                                            | 1                              | -            | 4              | -              | 1              | -              | 0                           | -            | 0              | -              | 2              | -              |         |
| <b>Birth weight (g)</b>                            |                                |              |                |                |                |                |                             |              |                |                |                |                |         |
| <500                                               | 69                             | 34.3         | 214            | 32.6           | 121            | 35.8           | 11                          | 7.6          | 23             | 4.7            | 8              | 3.4            | 0.162   |
| ≥500                                               | 132                            | 65.7         | 442            | 67.4           | 217            | 64.2           | 133                         | 92.4         | 470            | 95.3           | 230            | 96.6           |         |
| Missing                                            | 8                              | -            | 19             | -              | 28             | -              | 2                           | -            | 0              | -              | 8              | -              |         |
| <b>Congenital anomalies</b>                        |                                |              |                |                |                |                |                             |              |                |                |                |                |         |
| No                                                 | 200                            | 95.7         | 644            | 98.5           | 363            | 99.5           | 131                         | 89.7         | 462            | 96.9           | 245            | 99.6           | <0.001  |
| Yes                                                | 9                              | 4.3          | 10             | 1.5            | 2              | 0.5            | 15                          | 10.3         | 15             | 3.1            | 1              | 0.4            |         |
| Missing                                            | 0                              | -            | 21             | -              | 1              | -              | 0                           | -            | 16             | -              | 0              | -              |         |

Notes: g: grams.

Table S5: Baseline data for 25 and 26 week gestational age fetuses alive at maternal admission to hospital from the EXPRESS (Sweden, 2004-06), EPICure-2 (England, 2006) and EPIPAGE-2 (France, 2011) cohorts.

| Variable                                           | 25 weeks of gestational age |      |                |      |                | 26 weeks of gestational age |              |      |                |      | p-value |                |        |
|----------------------------------------------------|-----------------------------|------|----------------|------|----------------|-----------------------------|--------------|------|----------------|------|---------|----------------|--------|
|                                                    | EXPRESS<br>n                | %    | EPICure-2<br>n | %    | EPIPAGE-2<br>n | %                           | EXPRESS<br>n | %    | EPICure-2<br>n | %    |         | EPIPAGE-2<br>n | %      |
| <b>Level of neonatal care at delivery hospital</b> |                             |      |                |      |                |                             |              |      |                |      |         |                |        |
| 1                                                  | 6                           | 3.0  | 34             | 6.3  | 12             | 3.7                         | 3            | 1.4  | 42             | 7.2  | 14      | 3.3            | <0.001 |
| 2                                                  | 27                          | 13.5 | 148            | 27.3 | 41             | 12.6                        | 44           | 21.1 | 189            | 32.3 | 45      | 10.7           |        |
| 3                                                  | 167                         | 83.5 | 360            | 66.4 | 272            | 83.7                        | 162          | 77.5 | 355            | 60.6 | 363     | 86.0           |        |
| Missing                                            | 5                           | -    | 6              | -    | 0              | -                           | 0            | -    | 8              | -    | 0       | -              |        |
| <b>Antenatal steroids</b>                          |                             |      |                |      |                |                             |              |      |                |      |         |                |        |
| No                                                 | 24                          | 12.1 | 67             | 12.3 | 80             | 25.3                        | 14           | 7.1  | 84             | 14.3 | 82      | 19.7           | <0.001 |
| Yes                                                | 174                         | 87.9 | 477            | 87.7 | 236            | 74.7                        | 183          | 92.9 | 502            | 85.7 | 334     | 80.3           |        |
| Missing                                            | 7                           | -    | 4              | -    | 9              | -                           | 12           | -    | 8              | -    | 6       | -              |        |
| <b>Placental abruption</b>                         |                             |      |                |      |                |                             |              |      |                |      |         |                |        |
| No                                                 | 169                         | 86.7 | 506            | 93.0 | 308            | 96.2                        | 165          | 85.5 | 539            | 91.2 | 388     | 93.7           | 0.004  |
| Yes                                                | 26                          | 13.3 | 38             | 7.0  | 12             | 3.8                         | 28           | 14.5 | 52             | 8.8  | 26      | 6.3            |        |
| Missing                                            | 10                          | -    | 4              | -    | 5              | -                           | 16           | -    | 3              | -    | 8       | -              |        |
| <b>Multiple birth</b>                              |                             |      |                |      |                |                             |              |      |                |      |         |                |        |
| No                                                 | 167                         | 81.5 | 435            | 79.4 | 202            | 62.2                        | 158          | 75.6 | 435            | 73.2 | 307     | 72.7           | 0.735  |
| Yes                                                | 38                          | 18.5 | 113            | 20.6 | 123            | 37.8                        | 51           | 24.4 | 159            | 26.8 | 115     | 27.3           |        |
| <b>Delivery type</b>                               |                             |      |                |      |                |                             |              |      |                |      |         |                |        |
| Vaginal                                            | 78                          | 38.0 | 377            | 69.2 | 211            | 66.4                        | 67           | 32.1 | 336            | 56.7 | 171     | 40.8           | <0.001 |
| Caesarean                                          | 127                         | 62.0 | 168            | 30.8 | 107            | 33.6                        | 142          | 67.9 | 257            | 43.3 | 248     | 59.2           |        |
| Missing                                            | 0                           | -    | 3              | -    | 7              | -                           | 0            | -    | 1              | -    | 3       | -              |        |
| <b>Sex</b>                                         |                             |      |                |      |                |                             |              |      |                |      |         |                |        |
| Male                                               | 119                         | 58   | 295            | 53.8 | 181            | 55.7                        | 110          | 52.6 | 296            | 49.8 | 217     | 51.4           | 0.753  |
| Female                                             | 86                          | 42   | 253            | 46.2 | 144            | 44.3                        | 99           | 47.4 | 298            | 50.2 | 205     | 48.6           |        |
| Missing                                            | 0                           | -    | 0              | -    | 0              | -                           | 0            | -    | 0              | -    | 0       | -              |        |
| <b>Birth weight (g)</b>                            |                             |      |                |      |                |                             |              |      |                |      |         |                |        |
| <500g                                              | 8                           | 3.9  | 13             | 2.4  | 4              | 1.2                         | 3            | 1.4  | 10             | 1.7  | 9       | 2.1            | 0.791  |
| ≥500g                                              | 197                         | 96.1 | 535            | 97.6 | 320            | 98.8                        | 206          | 98.6 | 584            | 98.3 | 413     | 97.9           |        |
| Missing                                            | 0                           | -    | 0              | -    | 1              | -                           | 0            | -    | 0              | -    | 0       | -              |        |
| <b>Congenital anomalies</b>                        |                             |      |                |      |                |                             |              |      |                |      |         |                |        |
| No                                                 | 175                         | 85.4 | 520            | 98.3 | 314            | 96.9                        | 184          | 88.0 | 564            | 97.2 | 413     | 97.9           | <0.001 |
| Yes                                                | 30                          | 14.6 | 9              | 1.7  | 10             | 3.1                         | 25           | 12.0 | 16             | 2.8  | 9       | 2.1            |        |
| Missing                                            | 0                           | -    | 19             | -    | 1              | -                           | 0            | -    | 14             | -    | 0       | -              |        |

Notes: g: grams.

Table S6: Data for 22-23 and 24 week gestational age babies from the EXPRESS (Sweden, 2004-06), EPICure-2 (England, 2006) and EPIPAGE-2 (France, 2011) cohorts who were discharged alive from hospital.

| Variable                                    | 22-23 weeks of gestational age |      |           |      |           |       |         | 24 weeks of gestational age |      |           |      |           |       |         |
|---------------------------------------------|--------------------------------|------|-----------|------|-----------|-------|---------|-----------------------------|------|-----------|------|-----------|-------|---------|
|                                             | EXPRESS                        |      | EPICure-2 |      | EPIPAGE-2 |       | p-value | EXPRESS                     |      | EPICure-2 |      | EPIPAGE-2 |       | p-value |
| Levels                                      | n                              | %    | n         | %    | n         | %     |         | n                           | %    | n         | %    | n         | %     |         |
| <b>Sex</b>                                  |                                |      |           |      |           |       |         |                             |      |           |      |           |       |         |
| Male                                        | 27                             | 46.6 | 37        | 53.6 | 1         | 100.0 | 0.448   | 51                          | 53.7 | 82        | 46.1 | 29        | 50.0  | 0.48    |
| Female                                      | 31                             | 53.4 | 32        | 46.4 | 0         | 0.0   |         | 44                          | 46.3 | 96        | 53.9 | 29        | 50.0  |         |
| <b>Birth weight (g)</b>                     |                                |      |           |      |           |       |         |                             |      |           |      |           |       |         |
| <500g                                       | 6                              | 10.3 | 3         | 4.3  | 0         | 0.0   | 0.405   | 5                           | 5.3  | 1         | 0.6  | 1         | 1.7   | 0.036   |
| ≥500g                                       | 52                             | 89.7 | 66        | 95.7 | 1         | 100.0 |         | 90                          | 94.7 | 177       | 99.4 | 57        | 98.3  |         |
| <b>Congenital anomalies</b>                 |                                |      |           |      |           |       |         |                             |      |           |      |           |       |         |
| No                                          | 52                             | 89.7 | 66        | 98.5 | 1         | 100.0 | 0.095   | 86                          | 90.5 | 170       | 98.8 | 58        | 100.0 | <0.001  |
| Yes                                         | 6                              | 10.3 | 1         | 1.5  | 0         | 0.0   |         | 9                           | 9.5  | 2         | 1.2  | 0         | 0.0   |         |
| Missing                                     | 0                              | -    | 2         | -    | 0         | -     |         | 0                           | -    | 6         | -    | 0         | -     |         |
| <b>Highest grade of IVH</b>                 |                                |      |           |      |           |       |         |                             |      |           |      |           |       |         |
| 0                                           | 31                             | 53.4 | 25        | 36.8 | 1         | 100.0 | 0.244   | 60                          | 63.2 | 66        | 37.3 | 27        | 46.6  | <0.001  |
| 1                                           | 9                              | 15.5 | 16        | 23.5 | 0         | 0.0   |         | 18                          | 18.9 | 29        | 16.4 | 7         | 12.1  |         |
| 2                                           | 7                              | 12.1 | 18        | 26.5 | 0         | 0.0   |         | 8                           | 8.4  | 44        | 24.9 | 17        | 29.3  |         |
| 3                                           | 6                              | 10.3 | 2         | 2.9  | 0         | 0.0   |         | 3                           | 3.2  | 13        | 7.3  | 5         | 8.6   |         |
| 4                                           | 5                              | 8.6  | 7         | 10.3 | 0         | 0.0   |         | 6                           | 6.3  | 25        | 14.1 | 2         | 3.4   |         |
| Missing                                     | 0                              | -    | 1         | -    | 0         | -     |         | 0                           | -    | 1         | -    | 0         | -     |         |
| <b>Cystic PVL</b>                           |                                |      |           |      |           |       |         |                             |      |           |      |           |       |         |
| No                                          | 53                             | 91.4 | 64        | 94.1 | 1         | 100.0 | 0.805   | 90                          | 94.7 | 168       | 94.9 | 57        | 98.3  | 0.523   |
| Yes                                         | 5                              | 8.6  | 4         | 5.9  | 0         | 0.0   |         | 5                           | 5.3  | 9         | 5.1  | 1         | 1.7   |         |
| Missing                                     | 0                              | -    | 1         | -    | 0         | -     |         | 0                           | -    | 1         | -    | 0         | -     |         |
| <b>PDA treated surgically</b>               |                                |      |           |      |           |       |         |                             |      |           |      |           |       |         |
| No                                          | 28                             | 48.3 | 43        | 62.3 | 0         | 0.0   | 0.152   | 50                          | 52.6 | 137       | 77.0 | 35        | 62.5  | <0.001  |
| Yes                                         | 30                             | 51.7 | 26        | 37.7 | 1         | 100.0 |         | 45                          | 47.4 | 41        | 23.0 | 21        | 37.5  |         |
| Missing                                     | 0                              | -    | 0         | -    | 0         | -     |         | 0                           | -    | 0         | -    | 2         | -     |         |
| <b>NEC treated surgically</b>               |                                |      |           |      |           |       |         |                             |      |           |      |           |       |         |
| No                                          | 56                             | 96.6 | 64        | 92.8 | 0         | 0.0   | <0.001  | 88                          | 95.7 | 158       | 88.8 | 55        | 94.8  | 0.096   |
| Yes                                         | 2                              | 3.4  | 5         | 7.2  | 1         | 100.0 |         | 4                           | 4.3  | 20        | 11.2 | 3         | 5.2   |         |
| Missing                                     | 0                              | -    | 0         | -    | 0         | -     |         | 3                           | -    | 0         | -    | 0         | -     |         |
| <b>Bronchopulmonary dysplasia</b>           |                                |      |           |      |           |       |         |                             |      |           |      |           |       |         |
| None/mild                                   | 7                              | 13.0 | 9         | 13.0 | 0         | 0.0   | <0.001  | 19                          | 21.6 | 32        | 18.0 | 23        | 46.0  | <0.001  |
| Moderate                                    | 32                             | 59.3 | 16        | 23.2 | 0         | 0.0   |         | 42                          | 47.7 | 51        | 28.7 | 8         | 16.0  |         |
| Severe                                      | 15                             | 27.8 | 44        | 63.8 | 1         | 100.0 |         | 27                          | 30.7 | 95        | 53.4 | 19        | 38.0  |         |
| Missing                                     | 4                              | -    | 0         | -    | 0         | -     |         | 7                           | -    | 0         | -    | 8         | -     |         |
| <b>Treated ROP</b>                          |                                |      |           |      |           |       |         |                             |      |           |      |           |       |         |
| No                                          | 13                             | 28.3 | 32        | 59.3 | 1         | 100.0 | 0.004   | 24                          | 43.6 | 84        | 63.6 | 32        | 82.1  | <0.001  |
| Yes                                         | 33                             | 71.7 | 22        | 40.7 | 0         | 0.0   |         | 31                          | 56.4 | 48        | 36.4 | 7         | 17.9  |         |
| Missing                                     | 12                             | -    | 15        | -    | 0         | -     |         | 40                          | -    | 46        | -    | 19        | -     |         |
| <b>ROP Stage</b>                            |                                |      |           |      |           |       |         |                             |      |           |      |           |       |         |
| 0                                           | 5                              | 8.6  | 14        | 20.6 | 0         | 0.0   | 0.145   | 14                          | 14.9 | 45        | 25.4 | 12        | 31.6  | 0.092   |
| 1                                           | 5                              | 8.6  | 10        | 14.7 | 0         | 0.0   |         | 10                          | 10.6 | 27        | 15.3 | 10        | 26.3  |         |
| 2                                           | 11                             | 19.0 | 15        | 22.1 | 1         | 100.0 |         | 25                          | 26.6 | 42        | 23.7 | 7         | 18.4  |         |
| 3                                           | 35                             | 60.3 | 27        | 39.7 | 0         | 0.0   |         | 43                          | 45.7 | 62        | 35.0 | 9         | 23.7  |         |
| 4                                           | 0                              | 0.0  | 2         | 2.9  | 0         | 0.0   |         | 1                           | 1.1  | 0         | 0.0  | 0         | 0.0   |         |
| 5                                           | 2                              | 3.4  | 0         | 0.0  | 0         | 0.0   |         | 1                           | 1.1  | 1         | 0.6  | 0         | 0.0   |         |
| Missing                                     | 0                              | -    | 1         | -    | 0         | -     |         | 1                           | -    | 1         | -    | 20        | -     |         |
| <b>Total number of neonatal morbidities</b> |                                |      |           |      |           |       |         |                             |      |           |      |           |       |         |
| 0                                           | 10                             | 17.2 | 16        | 23.2 | 0         | 0.0   | 0.338   | 31                          | 32.6 | 52        | 29.2 | 28        | 48.3  | 0.002   |
| 1                                           | 30                             | 51.7 | 24        | 34.8 | 0         | 0.0   |         | 41                          | 43.2 | 55        | 30.9 | 22        | 37.9  |         |
| 2                                           | 14                             | 24.1 | 20        | 29.0 | 1         | 100.0 |         | 20                          | 21.1 | 46        | 25.8 | 7         | 12.1  |         |
| 3                                           | 4                              | 6.9  | 9         | 13.0 | 0         | 0.0   |         | 3                           | 3.2  | 22        | 12.4 | 1         | 1.7   |         |
| 4                                           | 0                              | 0.0  | 0         | 0.0  | 0         | 0.0   |         | 0                           | 0.0  | 3         | 1.7  | 0         | 0.0   |         |
| Missing                                     | 0                              | -    | 0         | -    | 0         | -     |         | 0                           | -    | 0         | -    | 0         | -     |         |

**Notes:** IVH: intraventricular haemorrhage; PVL: periventricular leukomalacia; PDA: patent ductus arteriosus; NEC: necrotising enterocolitis; ROP: retinopathy of prematurity. Total neonatal morbidities: IVH ≥ grade III, PVL, surgically treated NEC, ROP ≥ stage 3, severe bronchopulmonary dysplasia.

Table S7: Data for 25 and 26 week gestational age babies from the EXPRESS (Sweden, 2004-06), EPICure-2 (England, 2006) and EPIPAGE-2 (France, 2011) cohorts who were discharged alive.

| Variable                                    | 25 weeks of gestational age |      |           |      |           |      |         | 26 weeks of gestational age |      |           |      |           |      |         |
|---------------------------------------------|-----------------------------|------|-----------|------|-----------|------|---------|-----------------------------|------|-----------|------|-----------|------|---------|
|                                             | EXPRESS                     |      | EPICure-2 |      | EPIPAGE-2 |      | p-value | EXPRESS                     |      | EPICure-2 |      | EPIPAGE-2 |      | p-value |
| Levels                                      | n                           | %    | n         | %    | n         | %    |         | n                           | %    | n         | %    | n         | %    |         |
| <b>Sex</b>                                  |                             |      |           |      |           |      |         |                             |      |           |      |           |      |         |
| Male                                        | 98                          | 59.8 | 167       | 48.4 | 94        | 51.9 | 0.057   | 94                          | 52.2 | 219       | 48.9 | 156       | 50.2 | 0.748   |
| Female                                      | 66                          | 40.2 | 178       | 51.6 | 87        | 48.1 |         | 86                          | 47.8 | 229       | 51.1 | 155       | 49.8 |         |
| <b>Birth weight (g)</b>                     |                             |      |           |      |           |      |         |                             |      |           |      |           |      |         |
| <500g                                       | 4                           | 2.4  | 3         | 0.9  | 1         | 0.6  | 0.204   | 3                           | 1.7  | 5         | 1.1  | 2         | 0.6  | 0.561   |
| ≥500g                                       | 160                         | 97.6 | 342       | 99.1 | 180       | 99.4 |         | 177                         | 98.3 | 443       | 98.9 | 309       | 99.4 |         |
| <b>Congenital anomalies</b>                 |                             |      |           |      |           |      |         |                             |      |           |      |           |      |         |
| No                                          | 145                         | 88.4 | 335       | 99.1 | 179       | 98.9 | <0.001  | 159                         | 88.3 | 433       | 98.9 | 307       | 98.7 | <0.001  |
| Yes                                         | 19                          | 11.6 | 3         | 0.9  | 2         | 1.1  |         | 21                          | 11.7 | 5         | 1.1  | 4         | 1.3  |         |
| Missing                                     | 0                           | -    | 7         | -    | 0         | -    |         | 0                           | -    | 10        | -    | 0         | -    |         |
| <b>Highest grade of IVH</b>                 |                             |      |           |      |           |      |         |                             |      |           |      |           |      |         |
| 0                                           | 98                          | 59.8 | 164       | 47.7 | 78        | 43.1 | <0.001  | 121                         | 68.8 | 235       | 52.7 | 180       | 57.9 | <0.001  |
| 1                                           | 30                          | 18.3 | 59        | 17.2 | 30        | 16.6 |         | 32                          | 18.2 | 66        | 14.8 | 56        | 18.0 |         |
| 2                                           | 16                          | 9.8  | 46        | 13.4 | 59        | 32.6 |         | 14                          | 8.0  | 80        | 17.9 | 50        | 16.1 |         |
| 3                                           | 13                          | 7.9  | 21        | 6.1  | 7         | 3.9  |         | 4                           | 2.3  | 18        | 4.0  | 17        | 5.5  |         |
| 4                                           | 7                           | 4.3  | 54        | 15.7 | 7         | 3.9  |         | 5                           | 2.8  | 47        | 10.5 | 8         | 2.6  |         |
| Missing                                     | 0                           | -    | 1         | -    | 0         | -    |         | 4                           | -    | 2         | -    | 0         | -    |         |
| <b>Cystic PVL</b>                           |                             |      |           |      |           |      |         |                             |      |           |      |           |      |         |
| No                                          | 155                         | 94.5 | 326       | 94.8 | 177       | 97.8 | 0.222   | 171                         | 95.0 | 418       | 93.7 | 303       | 97.4 | 0.063   |
| Yes                                         | 9                           | 5.5  | 18        | 5.2  | 4         | 2.2  |         | 9                           | 5.0  | 28        | 6.3  | 8         | 2.6  |         |
| Missing                                     | 0                           | -    | 1         | -    | 0         | -    |         | 0                           | -    | 2         | -    | 0         | -    |         |
| <b>PDA treated surgically</b>               |                             |      |           |      |           |      |         |                             |      |           |      |           |      |         |
| No                                          | 124                         | 75.6 | 284       | 82.8 | 120       | 67.4 | <0.001  | 160                         | 88.9 | 403       | 91.0 | 251       | 83.9 | 0.014   |
| Yes                                         | 40                          | 24.4 | 59        | 17.2 | 58        | 32.6 |         | 20                          | 11.1 | 40        | 9.0  | 48        | 16.1 |         |
| Missing                                     | 0                           | -    | 2         | -    | 3         | -    |         | 0                           | -    | 5         | -    | 12        | -    |         |
| <b>NEC treated surgically</b>               |                             |      |           |      |           |      |         |                             |      |           |      |           |      |         |
| No                                          | 154                         | 95.1 | 320       | 92.8 | 173       | 95.6 | 0.352   | 178                         | 99.4 | 419       | 93.5 | 298       | 95.8 | 0.006   |
| Yes                                         | 8                           | 4.9  | 25        | 7.2  | 8         | 4.4  |         | 1                           | 0.6  | 29        | 6.5  | 13        | 4.2  |         |
| Missing                                     | 2                           | -    | 0         | -    | 0         | -    |         | 1                           | -    | 0         | -    | 0         | -    |         |
| <b>Bronchopulmonary dysplasia</b>           |                             |      |           |      |           |      |         |                             |      |           |      |           |      |         |
| None/mild                                   | 47                          | 31.3 | 111       | 32.2 | 95        | 58.6 | <0.001  | 69                          | 42.9 | 171       | 38.3 | 186       | 64.8 | <0.001  |
| Moderate                                    | 59                          | 39.3 | 99        | 28.7 | 20        | 12.3 |         | 66                          | 41.0 | 125       | 28.0 | 36        | 12.5 |         |
| Severe                                      | 44                          | 29.3 | 135       | 39.1 | 47        | 29.0 |         | 26                          | 16.1 | 151       | 33.8 | 65        | 22.6 |         |
| Missing                                     | 14                          | -    | 0         | -    | 19        | -    |         | 19                          | -    | 1         | -    | 24        | -    |         |
| <b>Treated ROP</b>                          |                             |      |           |      |           |      |         |                             |      |           |      |           |      |         |
| No                                          | 50                          | 64.1 | 161       | 73.9 | 97        | 90.7 | <0.001  | 37                          | 64.9 | 197       | 83.5 | 200       | 98.0 | <0.001  |
| Yes                                         | 28                          | 35.9 | 57        | 26.1 | 10        | 9.3  |         | 20                          | 35.1 | 39        | 16.5 | 4         | 2.0  |         |
| Missing                                     | 86                          | -    | 127       | -    | 74        | -    |         | 123                         | -    | 212       | -    | 107       | -    |         |
| <b>ROP stage</b>                            |                             |      |           |      |           |      |         |                             |      |           |      |           |      |         |
| 0                                           | 39                          | 23.8 | 126       | 36.6 | 53        | 48.6 | <0.001  | 79                          | 44.9 | 208       | 46.8 | 121       | 58.2 | <0.001  |
| 1                                           | 33                          | 20.1 | 61        | 17.7 | 20        | 18.3 |         | 27                          | 15.3 | 100       | 22.5 | 47        | 22.6 |         |
| 2                                           | 39                          | 23.8 | 84        | 24.4 | 22        | 20.2 |         | 37                          | 21.0 | 88        | 19.8 | 35        | 16.8 |         |
| 3                                           | 51                          | 31.1 | 73        | 21.2 | 13        | 11.9 |         | 33                          | 18.8 | 47        | 10.6 | 5         | 2.4  |         |
| 4                                           | 2                           | 1.2  | 0         | 0.0  | 1         | 0.9  |         | 0                           | 0.0  | 1         | 0.2  | 0         | 0.0  |         |
| 5                                           | 0                           | 0.0  | 0         | 0.0  | 0         | 0.0  |         | 0                           | 0.0  | 0         | 0.0  | 0         | 0.0  |         |
| Missing                                     | 0                           | -    | 1         | -    | 72        | -    |         | 4                           | -    | 4         | -    | 103       | -    |         |
| <b>Total number of neonatal morbidities</b> |                             |      |           |      |           |      |         |                             |      |           |      |           |      |         |
| 0                                           | 74                          | 45.1 | 126       | 36.5 | 111       | 61.3 | <0.001  | 116                         | 64.4 | 216       | 48.2 | 209       | 67.2 | <0.001  |
| 1                                           | 56                          | 34.1 | 139       | 40.3 | 55        | 30.4 |         | 53                          | 29.4 | 155       | 34.6 | 88        | 28.3 |         |
| 2                                           | 26                          | 15.9 | 56        | 16.2 | 13        | 7.2  |         | 8                           | 4.4  | 66        | 14.7 | 14        | 4.5  |         |
| 3                                           | 6                           | 3.7  | 21        | 6.1  | 2         | 1.1  |         | 3                           | 1.7  | 10        | 2.2  | 0         | 0.0  |         |
| 4                                           | 2                           | 1.2  | 3         | 0.9  | 0         | 0.0  |         | 0                           | 0.0  | 1         | 0.2  | 0         | 0.0  |         |
| Missing                                     | 0                           | -    | 0         | -    | 0         | -    |         | 0                           | -    | 0         | -    | 0         | -    |         |

**Notes:** IVH: intraventricular haemorrhage; PVL: periventricular leukomalacia; PDA: patent ductus arteriosus; NEC: necrotising enterocolitis; ROP: retinopathy of prematurity. Total neonatal morbidities: IVH ≥ grade III, PVL, surgically treated NEC, ROP ≥ stage 3, severe bronchopulmonary dysplasia.

Table S8: Data for 22-23 and 24 week gestational age babies from the EXPRESS (Sweden, 2004-06), EPICure-2 (England, 2006) and EPIPAGE-2 (France, 2011) cohorts who were discharged alive from hospital and survived to follow-up.

| Variable                                         | 22-23 weeks of gestational age |      |                |      |                |         | 24 weeks of gestational age |      |                |       |                |         |
|--------------------------------------------------|--------------------------------|------|----------------|------|----------------|---------|-----------------------------|------|----------------|-------|----------------|---------|
|                                                  | EXPRESS<br>n                   | %    | EPICure-2<br>n | %    | EPIPAGE-2<br>n | p-value | EXPRESS<br>n                | %    | EPICure-2<br>n | %     | EPIPAGE-2<br>n | p-value |
| <b>Survived to follow-up *</b>                   |                                |      |                |      |                |         |                             |      |                |       |                |         |
| Yes                                              | 55                             | 96.5 | 66             | 95.7 | 1              | 100.0   | 91                          | 97.8 | 177            | 99.4  | 58             | 100.0   |
| No                                               | 2                              | 3.5  | 3              | 4.3  | 0              | 0.0     | 2                           | 2.2  | 1              | 0.6   | 0              | 0.0     |
| <b>Blind</b>                                     |                                |      |                |      |                |         |                             |      |                |       |                |         |
| No                                               | 51                             | 98.1 | 37             | 97.4 | 1              | 100.0   | 84                          | 97.7 | 97             | 99.0  | 49             | 100.0   |
| Yes                                              | 1                              | 1.9  | 1              | 2.6  | 0              | 0.0     | 2                           | 2.3  | 1              | 1.0   | 0              | 0.0     |
| Missing                                          | 3                              | -    | 28             | -    | 0              | -       | 5                           | -    | 79             | -     | 9              | -       |
| <b>Deaf</b>                                      |                                |      |                |      |                |         |                             |      |                |       |                |         |
| No                                               | 49                             | 100  | 37             | 97.4 | 1              | 100.0   | 81                          | 98.8 | 98             | 100.0 | 49             | 100.0   |
| Yes                                              | 0                              | 0.0  | 1              | 2.6  | 0              | 0.0     | 1                           | 1.2  | 0              | 0.0   | 0              | 0.0     |
| Missing                                          | 6                              | -    | 28             | -    | 0              | -       | 9                           | -    | 79             | -     | 9              | -       |
| <b>Functional motor impairment level (GMFCS)</b> |                                |      |                |      |                |         |                             |      |                |       |                |         |
| None                                             | 47                             | 90.4 | 32             | 65.3 | 1              | 100     | 80                          | 93.0 | 103            | 75.2  | 45             | 90.0    |
| Mild (GMFCS 1)                                   | 1                              | 1.9  | 10             | 20.4 | 0              | 0.0     | 2                           | 2.3  | 22             | 16.1  | 3              | 6.0     |
| Moderate (GMFCS 2)                               | 3                              | 5.8  | 2              | 4.1  | 0              | 0.0     | 3                           | 3.5  | 5              | 3.6   | 2              | 4.0     |
| Severe (GMFCS 3-5)                               | 1                              | 1.9  | 5              | 10.2 | 0              | 0.0     | 1                           | 1.2  | 7              | 5.1   | 0              | 0.0     |
| Missing                                          | 3                              | -    | 17             | -    | 0              | -       | 5                           | -    | 40             | -     | 8              | -       |

**Notes:** GMFCS: Gross Motor Functional Classification System.

\* Three children from EXPRESS had emigrated or had a protected identity at 2.5 years of age, hence survival information were not available; they have been excluded from this table.



Table S9: Data for 25 and 26 week gestational age babies from the EXPRESS (Sweden, 2004-06), EPICure-2 (England, 2006) and EPIPAGE-2 (France, 2011) cohorts who were discharged alive from hospital and survived to follow-up.

| Variable                                         | 25 weeks of gestational age |              |                |                |                | 26 weeks of gestational age |              |              |                |                | p-value |                |                |
|--------------------------------------------------|-----------------------------|--------------|----------------|----------------|----------------|-----------------------------|--------------|--------------|----------------|----------------|---------|----------------|----------------|
|                                                  | EXPRESS<br>n                | EXPRESS<br>% | EPICure-2<br>n | EPICure-2<br>% | EPIPAGE-2<br>n | EPIPAGE-2<br>%              | EXPRESS<br>n | EXPRESS<br>% | EPICure-2<br>n | EPICure-2<br>% |         | EPIPAGE-2<br>n | EPIPAGE-2<br>% |
| <b>Survived to follow-up *</b>                   |                             |              |                |                |                |                             |              |              |                |                |         |                |                |
| Yes                                              | 161                         | 98.8         | 340            | 98.6           | 180            | 99.4                        | 174          | 97.2         | 446            | 99.6           | 305     | 98.1           | 0.046          |
| No                                               | 2                           | 1.2          | 5              | 1.4            | 1              | 0.6                         | 5            | 2.8          | 2              | 0.4            | 6       | 1.9            |                |
| <b>Blind</b>                                     |                             |              |                |                |                |                             |              |              |                |                |         |                |                |
| No                                               | 148                         | 99.3         | 187            | 99.5           | 128            | 99.2                        | 168          | 100.0        | 248            | 98.8           | 240     | 99.6           | 0.27           |
| Yes                                              | 1                           | 0.7          | 1              | 0.5            | 1              | 0.8                         | 0            | 0.0          | 3              | 1.2            | 1       | 0.4            |                |
| Missing                                          | 12                          | -            | 152            | -              | 51             | -                           | 6            | -            | 195            | -              | 64      | -              |                |
| <b>Deaf</b>                                      |                             |              |                |                |                |                             |              |              |                |                |         |                |                |
| No                                               | 147                         | 100.0        | 188            | 100.0          | 138            | 100.0                       | 165          | 100.0        | 251            | 100.0          | 253     | 100.0          | N/A            |
| Yes                                              | 0                           | 0.0          | 0              | 0.0            | 0              | 0.0                         | 0            | 0.0          | 0              | 0.0            | 0       | 0.0            |                |
| Missing                                          | 14                          | -            | 152            | -              | 42             | -                           | 9            | -            | 195            | -              | 52      | -              |                |
| <b>Functional motor impairment level (GMFCS)</b> |                             |              |                |                |                |                             |              |              |                |                |         |                |                |
| None                                             | 139                         | 93.3         | 191            | 77.6           | 126            | 89.4                        | 157          | 93.5         | 265            | 83.1           | 246     | 95.7           | <0.001         |
| Mild (GMFCS 1)                                   | 5                           | 3.4          | 30             | 12.2           | 8              | 5.7                         | 5            | 3.0          | 28             | 8.8            | 0       | 0.0            |                |
| Moderate (GMFCS 2)                               | 3                           | 2.0          | 11             | 4.5            | 3              | 2.1                         | 4            | 2.4          | 9              | 2.8            | 7       | 2.7            |                |
| Severe (GMFCS 3-5)                               | 2                           | 1.3          | 14             | 5.7            | 4              | 2.8                         | 2            | 1.2          | 17             | 5.3            | 4       | 1.6            |                |
| Missing                                          | 12                          | -            | 94             | -              | 39             | -                           | 6            | -            | 127            | -              | 48      | -              |                |

**Notes:** GMFCS: Gross Motor Functional Classification System; N/A: not applicable.

\* Two children from EXPRESS had emigrated or had a protected identity at 2.5 years of age, hence survival information were not available; they have been excluded from this table.

Table S10: Hazard ratios for mortality of singleton babies born extremely preterm in the EPICure-2 (England, 2006) and EPIPAGE-2 (France, 2011) cohorts in comparison to EXPRESS (Sweden, 2004-07) according to different baseline populations; unadjusted results and results adjusted for maternal age, parity, pre-existing diabetes and hypertension, pre-eclampsia, placental abruption, spontaneous labour, sex, and birth weight.

| GA           | Population                          | Unadjusted results |      |                |           |                 |     | Adjusted results |                |       |                 |    |          |
|--------------|-------------------------------------|--------------------|------|----------------|-----------|-----------------|-----|------------------|----------------|-------|-----------------|----|----------|
|              |                                     | EPICure-2          |      |                | EPIPAGE-2 |                 |     | EPICure-2        |                |       | EPIPAGE-2       |    |          |
|              |                                     | n                  | HR   | (95% CI)       | HR        | (95% CI)        | n   | HR               | (95% CI)       | HR    | (95% CI)        | HR | (95% CI) |
| <b>22-23</b> | Fetuses alive at maternal admission | 895                | 1.60 | (1.29 - 1.97)  | 3.85      | (3.05 - 4.86)   | 824 | 1.56             | (1.24 - 1.97)  | 4.15  | (3.20 - 5.38)   |    |          |
|              | Live births                         | 559                | 2.10 | (1.60 - 2.76)  | 4.72      | (3.41 - 6.55)   | 530 | 2.05             | (1.52 - 2.76)  | 5.51  | (3.84 - 7.92)   |    |          |
|              | Survived to 1 hour                  | 395                | 2.82 | (1.99 - 3.99)  | 6.39      | (4.13 - 9.89)   | 377 | 2.63             | (1.82 - 3.81)  | 7.08  | (4.36 - 11.49)  |    |          |
|              | Survived to 1 day                   | 202                | 3.70 | (2.17 - 6.33)  | 5.03      | (1.84 - 13.77)  | 199 | 3.66             | (2.10 - 6.36)  | 4.83  | (1.55 - 14.99)  |    |          |
|              | Survived to 7 days                  | 152                | 4.57 | (2.15 - 9.71)  | 7.04      | (1.86 - 26.64)  | 150 | 4.75             | (2.17 - 10.39) | 4.89  | (0.96 - 24.91)  |    |          |
|              | Survived to 28 days                 | 118                | 9.03 | (2.10 - 38.79) | 14.31     | (1.29 - 158.16) | 117 | 12.52            | (2.58 - 60.82) | 12.19 | (0.84 - 176.80) |    |          |
| <b>24</b>    | Fetuses alive at maternal admission | 657                | 2.42 | (1.72 - 3.41)  | 4.49      | (3.13 - 6.44)   | 626 | 2.24             | (1.56 - 3.22)  | 4.26  | (2.91 - 6.24)   |    |          |
|              | Live births                         | 569                | 2.17 | (1.52 - 3.09)  | 3.76      | (2.56 - 5.52)   | 546 | 2.06             | (1.41 - 3.01)  | 3.64  | (2.42 - 5.48)   |    |          |
|              | Survived to 1 hour                  | 503                | 2.47 | (1.66 - 3.66)  | 3.17      | (2.03 - 4.94)   | 484 | 2.38             | (1.57 - 3.62)  | 2.94  | (1.83 - 4.71)   |    |          |
|              | Survived to 1 day                   | 409                | 2.25 | (1.42 - 3.56)  | 2.58      | (1.50 - 4.44)   | 394 | 2.17             | (1.33 - 3.51)  | 2.29  | (1.29 - 4.07)   |    |          |
|              | Survived to 7 days                  | 367                | 2.75 | (1.59 - 4.77)  | 2.26      | (1.14 - 4.48)   | 354 | 2.89             | (1.61 - 5.19)  | 1.96  | (0.93 - 4.10)   |    |          |
|              | Survived to 28 days                 | 296                | 2.65 | (1.18 - 5.97)  | 1.76      | (0.59 - 5.23)   | 287 | 2.61             | (1.11 - 6.11)  | 1.84  | (0.61 - 5.58)   |    |          |
| <b>25</b>    | Fetuses alive at maternal admission | 804                | 2.05 | (1.40 - 2.99)  | 2.79      | (1.86 - 4.17)   | 770 | 1.97             | (1.31 - 2.94)  | 2.68  | (1.74 - 4.12)   |    |          |
|              | Live births                         | 760                | 1.90 | (1.27 - 2.85)  | 2.64      | (1.72 - 4.05)   | 729 | 1.85             | (1.20 - 2.84)  | 2.56  | (1.62 - 4.04)   |    |          |
|              | Survived to 1 hour                  | 736                | 1.89 | (1.23 - 2.89)  | 2.75      | (1.75 - 4.32)   | 707 | 1.85             | (1.17 - 2.91)  | 2.71  | (1.68 - 4.39)   |    |          |
|              | Survived to 1 day                   | 694                | 1.80 | (1.13 - 2.87)  | 2.62      | (1.59 - 4.30)   | 667 | 1.86             | (1.13 - 3.07)  | 2.74  | (1.61 - 4.67)   |    |          |
|              | Survived to 7 days                  | 633                | 2.27 | (1.22 - 4.23)  | 3.01      | (1.55 - 5.84)   | 610 | 2.18             | (1.12 - 4.24)  | 3.32  | (1.65 - 6.72)   |    |          |
|              | Survived to 28 days                 | 571                | 1.60 | (0.69 - 3.70)  | 1.84      | (0.71 - 4.76)   | 550 | 1.82             | (0.70 - 4.73)  | 2.68  | (0.94 - 7.66)   |    |          |
| <b>26</b>    | Fetuses alive at maternal admission | 900                | 1.89 | (1.19 - 2.99)  | 2.15      | (1.34 - 3.43)   | 856 | 1.95             | (1.21 - 3.16)  | 2.18  | (1.33 - 3.56)   |    |          |
|              | Live births                         | 879                | 1.88 | (1.16 - 3.04)  | 2.15      | (1.32 - 3.53)   | 835 | 1.98             | (1.19 - 3.27)  | 2.16  | (1.29 - 3.62)   |    |          |
|              | Survived to 1 hour                  | 866                | 1.77 | (1.09 - 2.87)  | 1.97      | (1.19 - 3.23)   | 823 | 1.90             | (1.14 - 3.15)  | 1.95  | (1.16 - 3.29)   |    |          |
|              | Survived to 1 day                   | 824                | 1.51 | (0.89 - 2.58)  | 1.87      | (1.09 - 3.23)   | 784 | 1.63             | (0.93 - 2.87)  | 1.91  | (1.07 - 3.38)   |    |          |
|              | Survived to 7 days                  | 768                | 1.72 | (0.87 - 3.43)  | 1.66      | (0.81 - 3.43)   | 729 | 1.37             | (0.67 - 2.79)  | 1.18  | (0.56 - 2.48)   |    |          |
|              | Survived to 28 days                 | 717                | 1.85 | (0.63 - 5.48)  | 1.23      | (0.37 - 4.07)   | 679 | 1.30             | (0.42 - 4.06)  | 0.66  | (0.18 - 2.43)   |    |          |

Notes: GA: gestational age (weeks) at delivery; HR: hazard ratio; CI: confidence interval.

Table S11: Mortality of singleton babies born extremely premature according to different baseline populations: chi-squared p-values testing scaled Schoenfeld residuals (to assess the proportional hazards assumption) for the EPICure-2 (England, 2006) and EPIPAGE-2 (France, 2011) cohorts in comparison to EXPRESS (Sweden, 2004-07), along with residual tests for the overall model. Obtained from Cox regression unadjusted and adjusted (for maternal age, parity, pre-existing diabetes and hypertension, pre-eclampsia, placental abruption, spontaneous labour, sex, and birth weight) models .

| GA           | Population                          | Unadjusted results |           |               | Adjusted results |           |               |
|--------------|-------------------------------------|--------------------|-----------|---------------|------------------|-----------|---------------|
|              |                                     | EPICure-2          | EPIPAGE-2 | Overall model | EPICure-2        | EPIPAGE-2 | Overall model |
| <b>22-23</b> | Fetuses alive at maternal admission | <0.001             | 0.848     | <0.001        | 0.001            | 0.752     | <0.001        |
|              | Live births                         | 0.002              | 0.857     | <0.001        | 0.001            | 0.784     | 0.009         |
|              | Survived to 1 hour                  | 0.039              | 0.978     | 0.022         | 0.002            | 0.185     | 0.102         |
|              | Survived to 1 day                   | 0.663              | 0.457     | 0.529         | 0.529            | 0.539     | 0.253         |
|              | Survived to 7 days                  | 0.895              | 0.165     | 0.262         | 0.868            | 0.111     | 0.601         |
|              | Survived to 28 days                 | 0.338              | 0.241     | 0.464         | >0.999           | >0.999    | >0.999        |
| <b>24</b>    | Fetuses alive at maternal admission | 0.004              | <0.001    | 0.001         | 0.008            | <0.001    | <0.001        |
|              | Live births                         | <0.001             | <0.001    | <0.001        | <0.001           | <0.001    | 0.001         |
|              | Survived to 1 hour                  | 0.071              | 0.019     | 0.064         | 0.127            | 0.028     | 0.490         |
|              | Survived to 1 day                   | 0.015              | 0.011     | 0.027         | 0.035            | 0.029     | 0.479         |
|              | Survived to 7 days                  | 0.434              | 0.131     | 0.301         | 0.997            | 0.455     | 0.946         |
|              | Survived to 28 days                 | 0.490              | 0.011     | 0.020         | 0.441            | 0.010     | 0.482         |
| <b>25</b>    | Fetuses alive at maternal admission | 0.779              | 0.988     | 0.895         | 0.392            | 0.392     | 0.089         |
|              | Live births                         | 0.847              | 0.937     | 0.976         | 0.841            | 0.579     | 0.691         |
|              | Survived to 1 hour                  | 0.459              | 0.475     | 0.741         | 0.773            | 0.916     | 0.243         |
|              | Survived to 1 day                   | 0.394              | 0.565     | 0.691         | 0.729            | 0.993     | 0.282         |
|              | Survived to 7 days                  | 0.664              | 0.242     | 0.377         | 0.600            | 0.278     | 0.493         |
|              | Survived to 28 days                 | 0.120              | 0.615     | 0.221         | 0.108            | 0.567     | 0.582         |
| <b>26</b>    | Fetuses alive at maternal admission | 0.998              | 0.775     | 0.886         | 0.675            | 0.463     | 0.078         |
|              | Live births                         | 0.888              | 0.634     | 0.818         | 0.526            | 0.304     | 0.111         |
|              | Survived to 1 hour                  | 0.995              | 0.994     | >0.999        | 0.689            | 0.624     | 0.086         |
|              | Survived to 1 day                   | 0.124              | 0.303     | 0.296         | 0.078            | 0.126     | 0.132         |
|              | Survived to 7 days                  | 0.424              | 0.717     | 0.671         | >0.999           | >0.999    | >0.999        |
|              | Survived to 28 days                 | 0.770              | 0.363     | 0.236         | >0.999           | >0.999    | >0.999        |

Notes: GA: gestational age (weeks) at delivery.

## 6. Supplementary figures

22 weeks of gestation

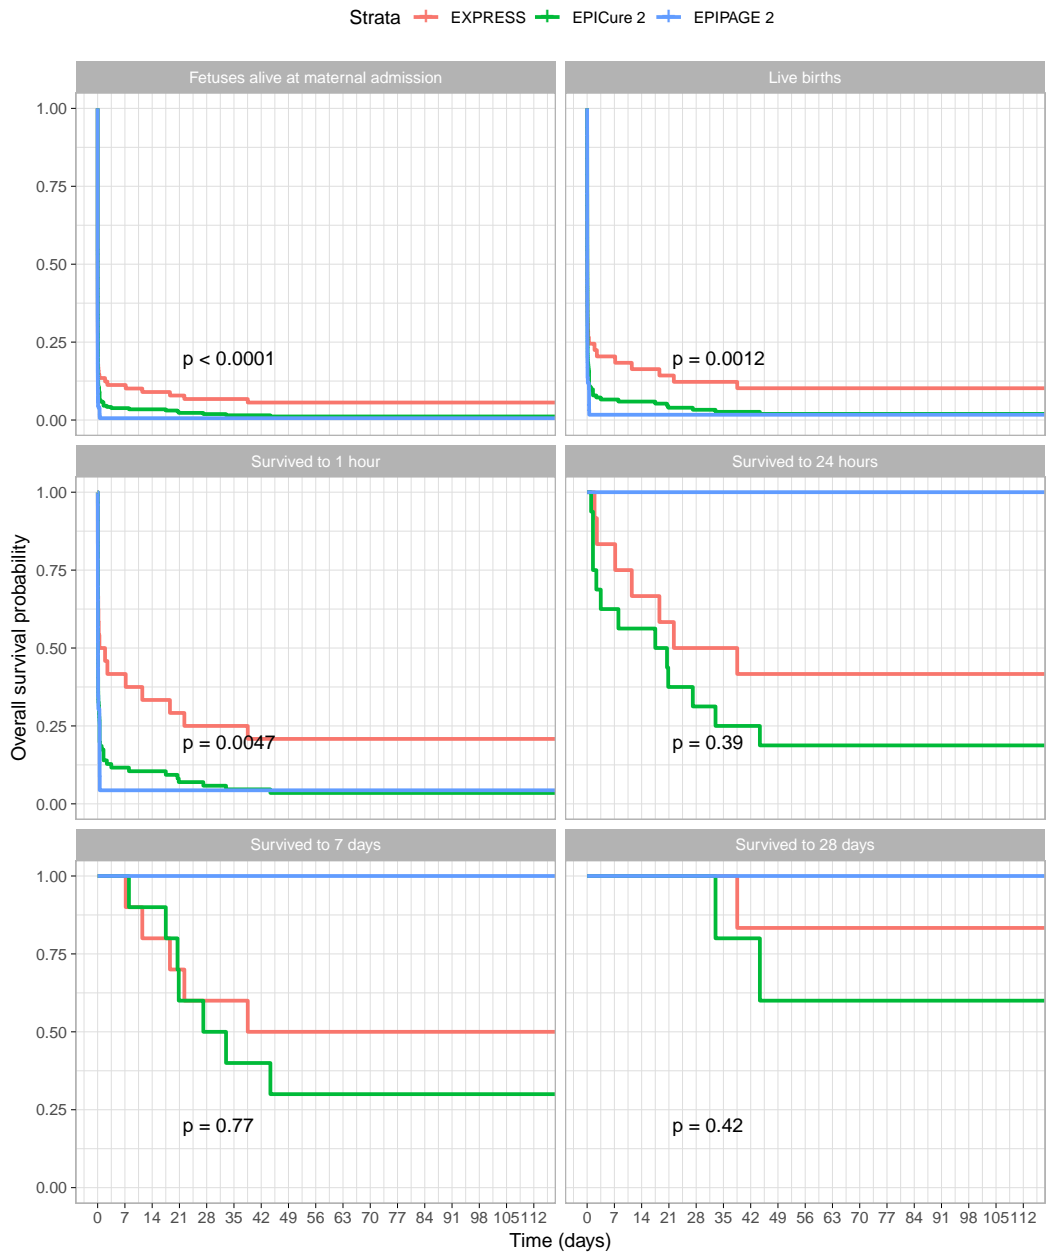

**Risk Table**

| Cohort    | Fetuses alive at maternal admission | Live births | Survived to 1 hour | Survived to 24 hours | Survived to 7 days | Survived to 28 days | Survived to 16 weeks |
|-----------|-------------------------------------|-------------|--------------------|----------------------|--------------------|---------------------|----------------------|
| EXPRESS   | 89                                  | 49          | 24                 | 12                   | 10                 | 6                   | 5                    |
| EPICure 2 | 262                                 | 152         | 86                 | 16                   | 10                 | 5                   | 3                    |
| EIPAGE 2  | 171                                 | 59          | 23                 | 1                    | 1                  | 1                   | 1                    |

Population

Figure 1: Survival curves for the EXPRESS (Sweden, 2004-07), EPICure-2 (England, 2006) and EIPAGE-2 (France, 2011) cohorts for fetuses born at 22 completed weeks of gestational age.

23 weeks of gestation

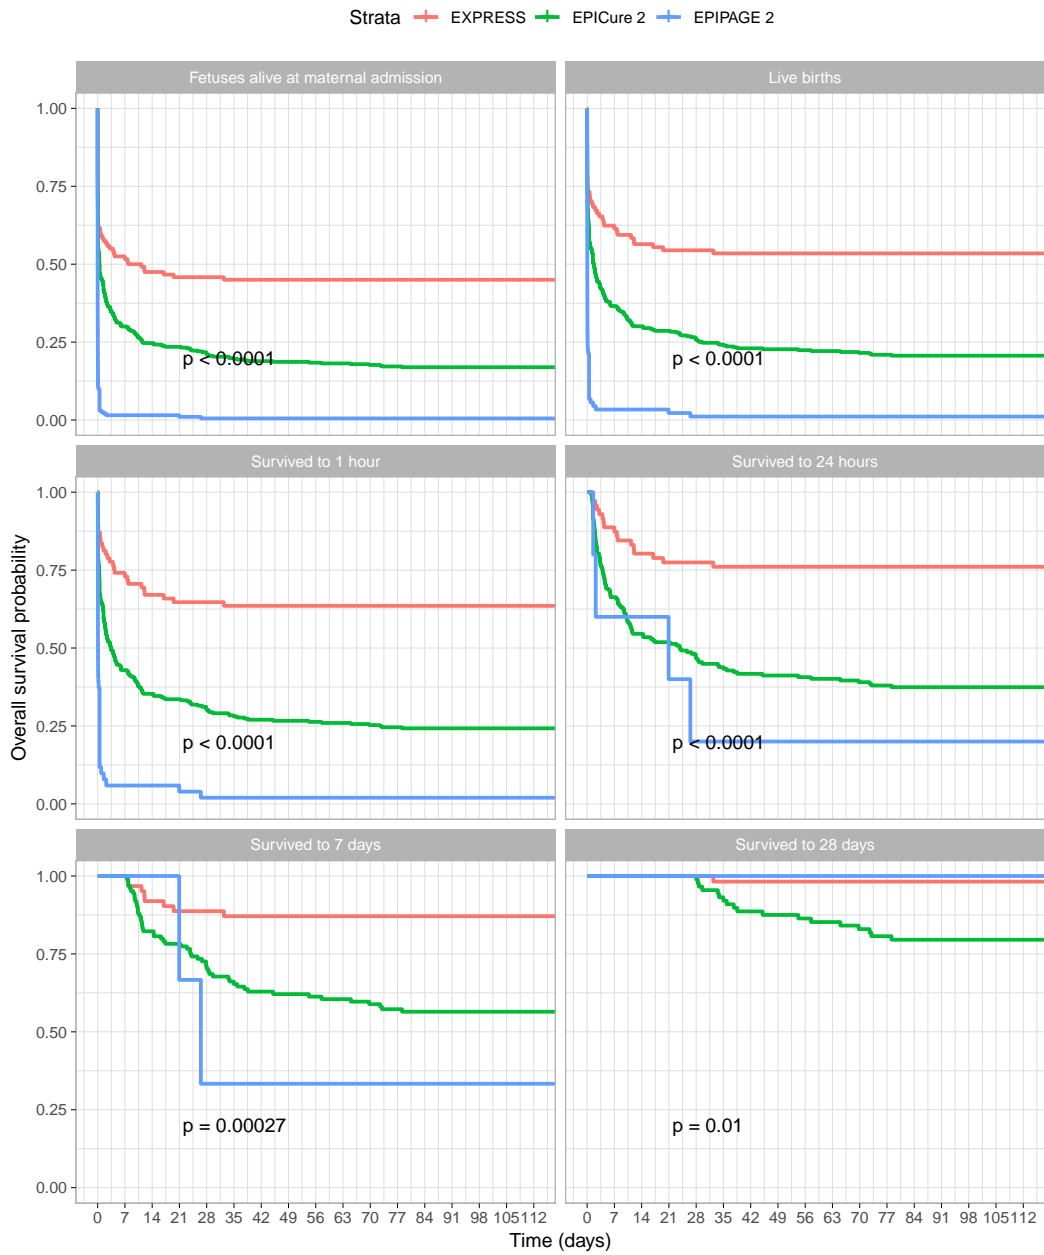

**Risk Table**

|           | Fetuses alive at maternal admission | Live births | Survived to 1 hour | Survived to 24 hours | Survived to 7 days | Survived to 28 days | Survived to 16 weeks |
|-----------|-------------------------------------|-------------|--------------------|----------------------|--------------------|---------------------|----------------------|
| EXPRESS   | 120                                 | 101         | 85                 | 71                   | 62                 | 55                  | 54                   |
| EPICure 2 | 413                                 | 339         | 289                | 187                  | 124                | 88                  | 70                   |
| EPIPAGE 2 | 195                                 | 89          | 51                 | 5                    | 3                  | 1                   | 1                    |

Population

Figure 2: Survival curves for the EXPRESS (Sweden, 2004-07), EPICure-2 (England, 2006) and EPIPAGE-2 (France, 2011) cohorts for fetuses born at 23 completed weeks of gestational age.

## References

- [1] L. A. Papile, J. Burstein, R. Burstein, H. Koffler, Incidence and evolution of subependymal and intraventricular hemorrhage: a study of infants with birth weights less than 1,500 gm, *The Journal of Pediatrics* 92 (4) (1978) 529–534.
- [2] A. H. Jobe, E. Bancalari, Bronchopulmonary dysplasia, *American Journal of Respiratory and Critical Care Medicine* 163 (7) (2001) 1723–1729. doi:10.1164/ajrccm.163.7.2011060.
- [3] I. C. for the Classification of Retinopathy of Prematurity, The International Classification of Retinopathy of Prematurity revisited, *Archives of Ophthalmology (Chicago, Ill. : 1960)* 123 (7) (2005) 991–999. doi:10.1001/archophth.123.7.991.
- [4] F. Serenius, K. Kallen, M. Blennow, U. Ewald, V. Fellman, G. Holmstrom, E. Lindberg, P. Lundqvist, K. Marsal, M. Norman, E. Olhager, L. Stigson, K. Stjernqvist, B. Vollmer, B. Stromberg, Neurodevelopmental outcome in extremely preterm infants at 2.5 years after active perinatal care in Sweden, *JAMA : the Journal of the American Medical Association* 309 (17) (2013) 1810–1820. doi:10.1001/jama.2013.3786.
- [5] T. Moore, E. M. Hennessy, J. Myles, S. J. Johnson, E. S. Draper, K. L. Costeloe, N. Marlow, Neurological and developmental outcome in extremely preterm children born in England in 1995 and 2006: the EPICure studies, *BMJ (Clinical Research ed.)* 345 (2012) e7961.
- [6] V. Pierrat, L. Marchand-Martin, C. Arnaud, M. Kaminski, M. Resche-Rigon, C. Lebeaux, F. Bodeau-Livinec, A. S. Morgan, F. Goffinet, S. Marret, P.-Y. Ancel, Neurodevelopmental outcome at 2 years for preterm children born at 22 to 34 weeks' gestation in France in 2011: EPIPAGE-2 cohort study, *BMJ (Clinical Research ed.)* 358 (2017) j3448.
- [7] R. Palisano, P. Rosenbaum, S. Walter, D. Russell, E. Wood, B. Galuppi, Development and reliability of a system to classify gross motor function in children with cerebral palsy, *Developmental Medicine and Child Neurology* 39 (4) (1997) 214–223.
- [8] J. P. Vandenbroucke, E. von Elm, D. G. Altman, P. C. Gotzsche, C. D. Mulrow, S. J. Pocock, C. Poole, J. J. Schlesselman, M. Egger, Strengthening the Reporting of Observational Studies in Epidemiology (STROBE): explanation and elaboration, *PLoS Medicine* 4 (10) (2007) e297. doi:10.1371/journal.pmed.0040297.
